# Supplementary material for: Liquid Biopsy Targeting Monocarboxylate Transporter 1 on the Surface Membrane of Tumor-Derived Extracellular Vesicles from Synovial Sarcoma
Source: MDPI journal article supplement (doi:10.3390/cancers13081823), 2021-04-11
Supplement: s1 [file s1]

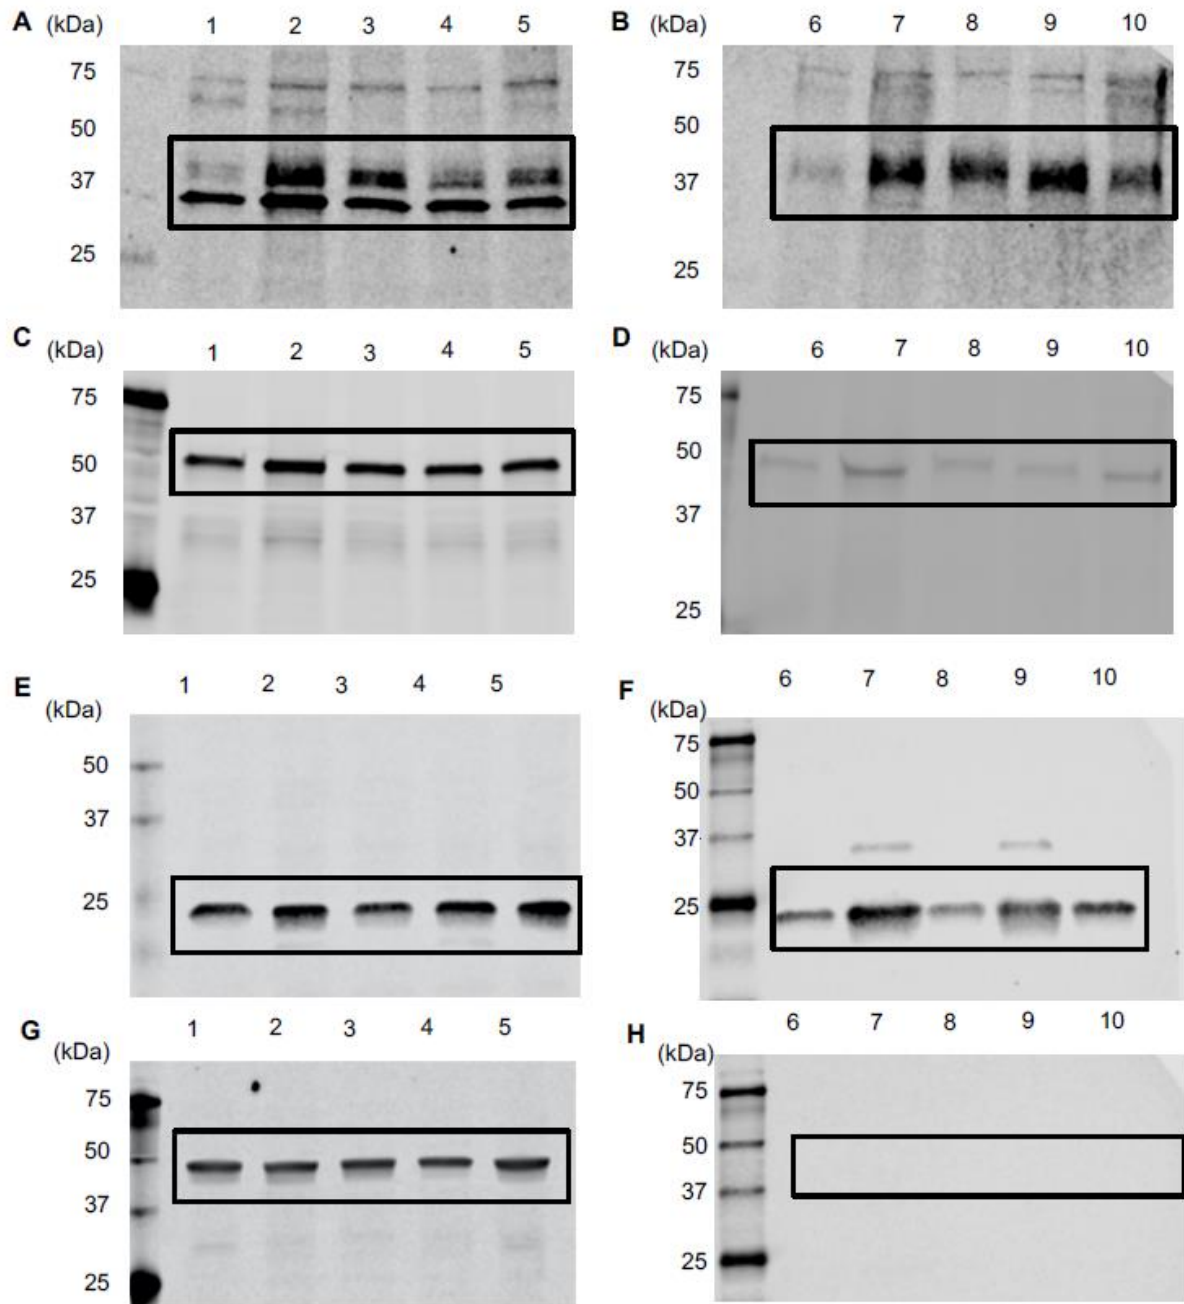

| Lane No. | Type of samples | Cell lines | Lane No. | Type of samples | Cell lines |
|----------|-----------------|------------|----------|-----------------|------------|
| 1        | Cells           | Aska-SS    | 6        | EVs             | Aska-SS    |
| 2        | Cells           | HS-SY-II   | 7        | EVs             | HS-SY-II   |
| 3        | Cells           | SYO-1      | 8        | EVs             | SYO-1      |
| 4        | Cells           | YaFuSS     | 9        | EVs             | YaFuSS     |
| 5        | Cells           | Yamato-SS  | 10       | EVs             | Yamato-SS  |

**Supplementary Figure S1.** Full-length blots shown in Figure 1C. (A, B) MCT1 (43kDa) and (C, D) Tubulin (50kDa). (E,F) CD81 (23kDa) and (C,D) Tubulin (50kDa).
