# Supplementary material for: Liquid Biopsy Targeting Monocarboxylate Transporter 1 on the Surface Membrane of Tumor-Derived Extracellular Vesicles from Synovial Sarcoma
Source: Cancers (Basel). 2021 Apr 11;13(8):1823. doi: 10.3390/cancers13081823 (PMC8069269; doi:10.3390/cancers13081823)
Supplement: Supplementary file 1 [file cancers-13-01823-s001.tgz]

Archive with 9 entries (8 files):
- Supplementaly Table 3.xlsx
- __MACOSX/
- __MACOSX/._Supplementaly Table 3.xlsx
- Supplementaly Table 2.xlsx
- __MACOSX/._Supplementaly Table 2.xlsx
- Supplementaly Table 1.xlsx
- __MACOSX/._Supplementaly Table 1.xlsx
- __MACOSX/._Supplementaly Figure.pdf
- Supplementary Figure.pdf
