# Supplementary material for: Liquid Biopsy Targeting Monocarboxylate Transporter 1 on the Surface Membrane of Tumor-Derived Extracellular Vesicles from Synovial Sarcoma
Source: Cancers (Basel). 2021 Apr 11;13(8):1823. doi: 10.3390/cancers13081823 (PMC8069269; doi:10.3390/cancers13081823)
Supplement: Supplementary file 1 [file cancers-13-01823-s001.tgz › Supplementaly Table 1.xlsx]

## Sheet: SYO-1
Supplementary Table 1-1. List of proteins included in the EVs secreted from SYO-1 cell line
Accession	Description	Sum (Coverage)	Sum (# Proteins)	Sum (# Unique Peptides)	Sum (# Peptides)	Sum (# PSMs)	Area	# Peptides A10	# Peptides A6	# PSM A10	# PSM A6	Coverage A10	Coverage A6	Score A10	Score A6	# AAs	MW [kDa]	calc. pI
P07477	Trypsin-1 OS=Homo sapiens GN=PRSS1 PE=1 SV=1 - [TRY1_HUMAN]	0.0729	2	2	2	119	1251000000	2	2	59	60	0.0729	0.0729	156.99	1104.75	247	26.5	6.51
P21741	Midkine OS=Homo sapiens GN=MDK PE=1 SV=1 - [MK_HUMAN]	0.3776	1	5	5	14	251300000	5	5	7	7	0.3776	0.3776	23.99	218.85	143	15.6	9.79
P0CG48	Polyubiquitin-C OS=Homo sapiens GN=UBC PE=1 SV=3 - [UBC_HUMAN]	0.6584	4	5	5	21	232300000	5	4	12	9	0.6584	0.565	28.68	195.24	685	77	7.66
P60033	CD81 antigen OS=Homo sapiens GN=CD81 PE=1 SV=1 - [CD81_HUMAN]	0.2839	1	4	4	23	204700000	4	4	12	11	0.2839	0.2839	35.27	213.22	236	25.8	5.29
P62805	Histone H4 OS=Homo sapiens GN=HIST1H4A PE=1 SV=2 - [H4_HUMAN]	0.5049	1	5	5	18	150800000	5	5	9	9	0.5049	0.5049	26.1	322.23	103	11.4	11.36
Q96KK5	Histone H2A type 1-H OS=Homo sapiens GN=HIST1H2AH PE=1 SV=3 - [H2A1H_HUMAN]	0.2734	14	2	3	10	141200000	2	3	5	5	0.2188	0.2734	14.49	123.69	128	13.9	10.89
P60709	Actin, cytoplasmic 1 OS=Homo sapiens GN=ACTB PE=1 SV=1 - [ACTB_HUMAN]	0.4053	7	5	11	41	136000000	11	10	21	20	0.4053	0.344	54.28	540.86	375	41.7	5.48
Q6NXT2	Histone H3.3C OS=Homo sapiens GN=H3F3C PE=1 SV=3 - [H3C_HUMAN]	0.1185	5	2	2	3	109800000	1	2	1	2	0.0667	0.1185	2.54	55.87	135	15.2	11.11
P11142	Heat shock cognate 71 kDa protein OS=Homo sapiens GN=HSPA8 PE=1 SV=1 - [HSP7C_HUMAN]	0.3824	2	12	18	51	90770000	18	17	26	25	0.3824	0.3483	78.74	784.1	646	70.9	5.52
P62937	Peptidyl-prolyl cis-trans isomerase A OS=Homo sapiens GN=PPIA PE=1 SV=2 - [PPIA_HUMAN]	0.4545	2	8	8	19	89860000	7	8	9	10	0.3455	0.4545	20.48	254.18	165	18	7.81
O00560	Syntenin-1 OS=Homo sapiens GN=SDCBP PE=1 SV=1 - [SDCB1_HUMAN]	0.3154	1	5	5	22	87790000	5	5	11	11	0.3154	0.3154	29.92	258.01	298	32.4	7.53
Q8WUM4	Programmed cell death 6-interacting protein OS=Homo sapiens GN=PDCD6IP PE=1 SV=1 - [PDC6I_HUMAN]	0.3929	1	31	31	74	71180000	29	30	38	36	0.3744	0.3583	97.45	969.77	868	96	6.52
P08962	CD63 antigen OS=Homo sapiens GN=CD63 PE=1 SV=2 - [CD63_HUMAN]	0.0756	1	2	2	5	67480000	1	2	2	3	0.042	0.0756	5.4	96	238	25.6	7.81
Q9P2B2	Prostaglandin F2 receptor negative regulator OS=Homo sapiens GN=PTGFRN PE=1 SV=2 - [FPRP_HUMAN]	0.3129	1	24	24	64	67180000	24	23	33	31	0.3129	0.3026	88.54	960.81	879	98.5	6.61
P16401	Histone H1.5 OS=Homo sapiens GN=HIST1H1B PE=1 SV=3 - [H15_HUMAN]	0.2168	1	5	5	10	67160000	4	5	5	5	0.146	0.2168	13.89	209.25	226	22.6	10.92
P12109	Collagen alpha-1(VI) chain OS=Homo sapiens GN=COL6A1 PE=1 SV=3 - [CO6A1_HUMAN]	0.2451	1	18	18	53	64550000	18	18	27	26	0.2451	0.2451	83.44	730.66	1028	108.5	5.43
P08107	Heat shock 70 kDa protein 1A/1B OS=Homo sapiens GN=HSPA1A PE=1 SV=5 - [HSP71_HUMAN]	0.3089	2	12	14	38	60270000	13	14	19	19	0.2605	0.3089	47.05	543.39	641	70	5.66
P08670	Vimentin OS=Homo sapiens GN=VIM PE=1 SV=4 - [VIME_HUMAN]	0.4807	11	25	25	53	55390000	25	24	27	26	0.4807	0.4506	78.25	821.57	466	53.6	5.12
P35613	Basigin OS=Homo sapiens GN=BSG PE=1 SV=2 - [BASI_HUMAN]	0.2208	1	7	7	32	51900000	7	7	16	16	0.2208	0.2208	56.21	575.66	385	42.2	5.66
O75340	Programmed cell death protein 6 OS=Homo sapiens GN=PDCD6 PE=1 SV=1 - [PDCD6_HUMAN]	0.4241	1	6	6	16	48300000	6	6	8	8	0.4241	0.4241	21.64	235.79	191	21.9	5.4
P02768	Serum albumin OS=Homo sapiens GN=ALB PE=1 SV=2 - [ALBU_HUMAN]	0.2069	1	13	13	28	45830000	13	13	14	14	0.2069	0.2069	39.04	396.42	609	69.3	6.28
P61224	Ras-related protein Rap-1b OS=Homo sapiens GN=RAP1B PE=1 SV=1 - [RAP1B_HUMAN]	0.4511	3	3	8	21	42420000	7	8	10	11	0.3967	0.4511	30.76	348.81	184	20.8	5.78
P08758	Annexin A5 OS=Homo sapiens GN=ANXA5 PE=1 SV=2 - [ANXA5_HUMAN]	0.5313	1	12	13	37	41600000	13	13	19	18	0.5313	0.5313	44.89	430.02	320	35.9	5.05
P07355	Annexin A2 OS=Homo sapiens GN=ANXA2 PE=1 SV=2 - [ANXA2_HUMAN]	0.4277	2	12	12	40	41550000	12	12	20	20	0.4277	0.4277	63.06	581.62	339	38.6	7.75
P63104	14-3-3 protein zeta/delta OS=Homo sapiens GN=YWHAZ PE=1 SV=1 - [1433Z_HUMAN]	0.4204	1	6	9	28	38230000	8	9	14	14	0.4163	0.4204	39.96	453.26	245	27.7	4.79
Q06830	Peroxiredoxin-1 OS=Homo sapiens GN=PRDX1 PE=1 SV=1 - [PRDX1_HUMAN]	0.392	2	6	7	14	37280000	7	6	7	7	0.392	0.3518	16.73	184.26	199	22.1	8.13
Q9H444	Charged multivesicular body protein 4b OS=Homo sapiens GN=CHMP4B PE=1 SV=1 - [CHM4B_HUMAN]	0.3929	1	7	7	18	36320000	7	7	9	9	0.3929	0.3929	30.61	303.9	224	24.9	4.82
Q92783	Signal transducing adapter molecule 1 OS=Homo sapiens GN=STAM PE=1 SV=3 - [STAM1_HUMAN]	0.2185	1	7	8	21	34710000	7	7	11	10	0.1926	0.2056	29.34	371.78	540	59.1	4.82
P08133	Annexin A6 OS=Homo sapiens GN=ANXA6 PE=1 SV=3 - [ANXA6_HUMAN]	0.526	1	30	30	85	34210000	28	28	43	42	0.5022	0.5052	119.9	1213.24	673	75.8	5.6
P05387	60S acidic ribosomal protein P2 OS=Homo sapiens GN=RPLP2 PE=1 SV=1 - [RLA2_HUMAN]	0.6522	1	3	4	10	33740000	4	4	5	5	0.6522	0.6522	17.58	214.7	115	11.7	4.54
Q15758	Neutral amino acid transporter B(0) OS=Homo sapiens GN=SLC1A5 PE=1 SV=2 - [AAAT_HUMAN]	0.1571	1	7	7	18	31110000	7	7	9	9	0.1571	0.1571	25.37	226.22	541	56.6	5.48
P49006	MARCKS-related protein OS=Homo sapiens GN=MARCKSL1 PE=1 SV=2 - [MRP_HUMAN]	0.6923	1	5	5	13	29900000	4	5	6	7	0.4974	0.6923	21.28	168.01	195	19.5	4.67
P13987	CD59 glycoprotein OS=Homo sapiens GN=CD59 PE=1 SV=1 - [CD59_HUMAN]	0.0938	1	1	1	4	28000000	1	1	2	2	0.0938	0.0938	7.03	89.47	128	14.2	6.48
Q9H9H4	Vacuolar protein sorting-associated protein 37B OS=Homo sapiens GN=VPS37B PE=1 SV=1 - [VP37B_HUMAN]	0.3895	1	7	7	29	23790000	7	7	15	14	0.3895	0.3895	42.69	387.42	285	31.3	7.34
Q969P0	Immunoglobulin superfamily member 8 OS=Homo sapiens GN=IGSF8 PE=1 SV=1 - [IGSF8_HUMAN]	0.1941	1	9	9	19	22690000	9	8	10	9	0.1941	0.1631	31	292.91	613	65	8
P01023	Alpha-2-macroglobulin OS=Homo sapiens GN=A2M PE=1 SV=3 - [A2MG_HUMAN]	0.0577	1	6	6	16	22210000	6	6	8	8	0.0577	0.0577	24.58	257.71	1474	163.2	6.46
P05556	Integrin beta-1 OS=Homo sapiens GN=ITGB1 PE=1 SV=2 - [ITB1_HUMAN]	0.193	1	13	13	34	22140000	12	13	16	18	0.1792	0.193	43.52	458.22	798	88.4	5.39
P62158	Calmodulin OS=Homo sapiens GN=CALM1 PE=1 SV=2 - [CALM_HUMAN]	0.4161	1	5	5	17	22100000	4	5	9	8	0.4161	0.4161	20.48	172.8	149	16.8	4.22
P01871	Ig mu chain C region OS=Homo sapiens GN=IGHM PE=1 SV=3 - [IGHM_HUMAN]	0.1637	2	6	6	17	21720000	6	5	9	8	0.1637	0.1305	22.86	243.88	452	49.3	6.77
P07737	Profilin-1 OS=Homo sapiens GN=PFN1 PE=1 SV=2 - [PROF1_HUMAN]	0.4214	1	5	5	9	21670000	5	4	5	4	0.4214	0.3571	13.95	142.69	140	15	8.27
P02751	Fibronectin OS=Homo sapiens GN=FN1 PE=1 SV=4 - [FINC_HUMAN]	0.176	1	29	29	85	20720000	28	27	43	42	0.1731	0.1643	127.05	993.38	2386	262.5	5.71
P62258	14-3-3 protein epsilon OS=Homo sapiens GN=YWHAE PE=1 SV=1 - [1433E_HUMAN]	0.5333	1	10	11	31	20480000	11	10	16	15	0.5333	0.502	46.63	397.32	255	29.2	4.74
Q9C0H2	Protein tweety homolog 3 OS=Homo sapiens GN=TTYH3 PE=1 SV=3 - [TTYH3_HUMAN]	0.1338	1	7	7	19	20400000	6	7	9	10	0.1185	0.1338	28.21	346.26	523	57.5	5.39
O60814	Histone H2B type 1-K OS=Homo sapiens GN=HIST1H2BK PE=1 SV=3 - [H2B1K_HUMAN]	0.2063	15	2	2	14	19910000	2	2	7	7	0.2063	0.2063	23.93	229.9	126	13.9	10.32
P27348	14-3-3 protein theta OS=Homo sapiens GN=YWHAQ PE=1 SV=1 - [1433T_HUMAN]	0.4041	2	5	9	26	18870000	8	8	13	13	0.4	0.3714	38.1	419.95	245	27.7	4.78
P23528	Cofilin-1 OS=Homo sapiens GN=CFL1 PE=1 SV=3 - [COF1_HUMAN]	0.3193	2	4	4	11	18640000	4	4	5	6	0.3193	0.3193	16.9	138.69	166	18.5	8.09
P31946	14-3-3 protein beta/alpha OS=Homo sapiens GN=YWHAB PE=1 SV=3 - [1433B_HUMAN]	0.3618	2	3	8	24	18580000	7	7	12	12	0.3577	0.2846	30.63	303.27	246	28.1	4.83
Q9P273	Teneurin-3 OS=Homo sapiens GN=TENM3 PE=2 SV=3 - [TEN3_HUMAN]	0.0619	1	10	10	21	18420000	10	7	13	8	0.0619	0.0411	36.18	313.6	2699	300.8	6.42
Q9NRY6	Phospholipid scramblase 3 OS=Homo sapiens GN=PLSCR3 PE=1 SV=2 - [PLS3_HUMAN]	0.1966	1	3	3	8	18400000	3	3	4	4	0.1966	0.1966	11.07	109.73	295	31.6	6.65
P06733	Alpha-enolase OS=Homo sapiens GN=ENO1 PE=1 SV=2 - [ENOA_HUMAN]	0.265	3	9	9	24	18040000	9	9	12	12	0.265	0.265	38.49	434.08	434	47.1	7.39
O75531	Barrier-to-autointegration factor OS=Homo sapiens GN=BANF1 PE=1 SV=1 - [BAF_HUMAN]	0.2697	1	1	1	4	17670000	1	1	2	2	0.2697	0.2697	6.38	46.12	89	10.1	6.09
P08195	4F2 cell-surface antigen heavy chain OS=Homo sapiens GN=SLC3A2 PE=1 SV=3 - [4F2_HUMAN]	0.2825	1	14	14	30	17480000	14	14	15	15	0.2825	0.2825	48.51	571.45	630	68	5.01
P02765	Alpha-2-HS-glycoprotein OS=Homo sapiens GN=AHSG PE=1 SV=1 - [FETUA_HUMAN]	0.0518	1	2	2	4	17050000	2	2	2	2	0.0518	0.0518	6.66	100.79	367	39.3	5.72
P61981	14-3-3 protein gamma OS=Homo sapiens GN=YWHAG PE=1 SV=2 - [1433G_HUMAN]	0.3077	2	4	7	26	16040000	7	7	13	13	0.3077	0.3077	38.08	361.33	247	28.3	4.89
Q9UBI6	Guanine nucleotide-binding protein G(I)/G(S)/G(O) subunit gamma-12 OS=Homo sapiens GN=GNG12 PE=1 SV=3 - [GBG12_HUMAN]	0.4167	1	2	2	4	15790000	2	2	2	2	0.4167	0.4167	3.55	30.55	72	8	8.97
P04406	Glyceraldehyde-3-phosphate dehydrogenase OS=Homo sapiens GN=GAPDH PE=1 SV=3 - [G3P_HUMAN]	0.2328	1	5	5	10	15680000	5	5	5	5	0.2328	0.2328	17.27	237.69	335	36	8.46
P60174	Triosephosphate isomerase OS=Homo sapiens GN=TPI1 PE=1 SV=3 - [TPIS_HUMAN]	0.4406	1	9	9	22	15630000	9	9	11	11	0.4406	0.4406	39.88	424.86	286	30.8	5.92
Q04917	14-3-3 protein eta OS=Homo sapiens GN=YWHAH PE=1 SV=4 - [1433F_HUMAN]	0.2276	2	3	5	16	15130000	5	5	8	8	0.2276	0.2276	22.9	230.92	246	28.2	4.84
P60953	Cell division control protein 42 homolog OS=Homo sapiens GN=CDC42 PE=1 SV=2 - [CDC42_HUMAN]	0.2565	3	3	4	17	14810000	4	4	8	9	0.2565	0.2565	21.32	158.48	191	21.2	6.55
P08238	Heat shock protein HSP 90-beta OS=Homo sapiens GN=HSP90AB1 PE=1 SV=4 - [HS90B_HUMAN]	0.2334	9	8	15	32	14600000	15	11	18	14	0.2334	0.192	52.26	536.59	724	83.2	5.03
P69905	Hemoglobin subunit alpha OS=Homo sapiens GN=HBA1 PE=1 SV=2 - [HBA_HUMAN]	0.1761	1	2	2	4	14550000	2	2	2	2	0.1761	0.1761	4.87	33.93	142	15.2	8.68
O14964	Hepatocyte growth factor-regulated tyrosine kinase substrate OS=Homo sapiens GN=HGS PE=1 SV=1 - [HGS_HUMAN]	0.1596	1	9	9	24	14530000	8	9	12	12	0.1493	0.1596	36.47	322.53	777	86.1	6.16
P32119	Peroxiredoxin-2 OS=Homo sapiens GN=PRDX2 PE=1 SV=5 - [PRDX2_HUMAN]	0.3182	1	5	6	14	14380000	6	6	7	7	0.3182	0.3182	18.01	189.96	198	21.9	5.97
P63000	Ras-related C3 botulinum toxin substrate 1 OS=Homo sapiens GN=RAC1 PE=1 SV=1 - [RAC1_HUMAN]	0.3438	5	5	6	11	14300000	5	6	5	6	0.2708	0.3438	12.49	113.54	192	21.4	8.5
P68371	Tubulin beta-4B chain OS=Homo sapiens GN=TUBB4B PE=1 SV=1 - [TBB4B_HUMAN]	0.2562	5	2	10	22	13930000	10	8	12	10	0.2562	0.218	30.68	240.9	445	49.8	4.89
P07900	Heat shock protein HSP 90-alpha OS=Homo sapiens GN=HSP90AA1 PE=1 SV=5 - [HS90A_HUMAN]	0.1421	7	3	10	21	13640000	10	9	11	10	0.1421	0.1407	35.28	411.33	732	84.6	5.02
O00468	Agrin OS=Homo sapiens GN=AGRN PE=1 SV=5 - [AGRIN_HUMAN]	0.1824	1	23	23	66	13250000	23	22	34	32	0.1824	0.1756	108.39	941	2067	217.1	6.39
P07437	Tubulin beta chain OS=Homo sapiens GN=TUBB PE=1 SV=2 - [TBB5_HUMAN]	0.2568	5	2	10	20	13110000	10	8	11	9	0.2568	0.2185	29.71	230.11	444	49.6	4.89
P15531	Nucleoside diphosphate kinase A OS=Homo sapiens GN=NME1 PE=1 SV=1 - [NDKA_HUMAN]	0.4605	1	2	6	19	13070000	5	6	9	10	0.3816	0.4605	26.29	211.99	152	17.1	6.19
P51149	Ras-related protein Rab-7a OS=Homo sapiens GN=RAB7A PE=1 SV=1 - [RAB7A_HUMAN]	0.5604	1	10	10	22	12940000	8	10	10	12	0.4976	0.5604	30.25	359.9	207	23.5	6.7
P53990	IST1 homolog OS=Homo sapiens GN=IST1 PE=1 SV=1 - [IST1_HUMAN]	0.228	1	7	7	22	12400000	7	7	11	11	0.228	0.228	25.96	205.49	364	39.7	5.35
A5D8V6	Vacuolar protein sorting-associated protein 37C OS=Homo sapiens GN=VPS37C PE=1 SV=2 - [VP37C_HUMAN]	0.0873	1	3	3	6	12170000	3	3	3	3	0.0873	0.0873	8.99	125.02	355	38.6	5.21
P18065	Insulin-like growth factor-binding protein 2 OS=Homo sapiens GN=IGFBP2 PE=1 SV=2 - [IBP2_HUMAN]	0.3785	1	9	9	26	12140000	9	9	13	13	0.3785	0.3785	40.23	354.18	325	34.8	7.5
P50151	Guanine nucleotide-binding protein G(I)/G(S)/G(O) subunit gamma-10 OS=Homo sapiens GN=GNG10 PE=1 SV=1 - [GBG10_HUMAN]	0.2206	1	1	1	2	11950000	1	1	1	1	0.2206	0.2206	2.94	48.43	68	7.2	7.85
P02649	Apolipoprotein E OS=Homo sapiens GN=APOE PE=1 SV=1 - [APOE_HUMAN]	0.2461	1	7	7	14	11680000	7	7	7	7	0.2461	0.2461	23.49	288.06	317	36.1	5.73
Q9NZZ3	Charged multivesicular body protein 5 OS=Homo sapiens GN=CHMP5 PE=1 SV=1 - [CHMP5_HUMAN]	0.1689	1	2	2	6	11030000	2	2	3	3	0.1689	0.1689	9.28	78.26	219	24.6	4.83
Q99961	Endophilin-A2 OS=Homo sapiens GN=SH3GL1 PE=1 SV=1 - [SH3G1_HUMAN]	0.2853	2	9	9	16	11020000	8	8	8	8	0.2636	0.2636	23.26	268.73	368	41.5	5.43
Q04941	Proteolipid protein 2 OS=Homo sapiens GN=PLP2 PE=1 SV=1 - [PLP2_HUMAN]	0.0855	1	1	1	2	10870000	1	1	1	1	0.0855	0.0855	2.2	69.3	152	16.7	7.24
P13473	Lysosome-associated membrane glycoprotein 2 OS=Homo sapiens GN=LAMP2 PE=1 SV=2 - [LAMP2_HUMAN]	0.0415	1	2	2	4	10830000	2	2	2	2	0.0415	0.0415	4.66	69.59	410	44.9	5.63
P05386	60S acidic ribosomal protein P1 OS=Homo sapiens GN=RPLP1 PE=1 SV=1 - [RLA1_HUMAN]	0.2895	1	1	2	4	10580000	2	2	2	2	0.2895	0.2895	7.95	93.83	114	11.5	4.32
P61204	ADP-ribosylation factor 3 OS=Homo sapiens GN=ARF3 PE=1 SV=2 - [ARF3_HUMAN]	0.2762	4	4	4	8	10290000	4	4	4	4	0.2762	0.2762	13.64	215.47	181	20.6	7.43
P05023	Sodium/potassium-transporting ATPase subunit alpha-1 OS=Homo sapiens GN=ATP1A1 PE=1 SV=1 - [AT1A1_HUMAN]	0.1926	6	15	15	32	10270000	13	15	15	17	0.1769	0.1926	50.4	680.27	1023	112.8	5.49
P09525	Annexin A4 OS=Homo sapiens GN=ANXA4 PE=1 SV=4 - [ANXA4_HUMAN]	0.2539	1	5	6	13	10110000	6	6	7	6	0.2539	0.2539	21.02	229.91	319	35.9	6.13
P31689	DnaJ homolog subfamily A member 1 OS=Homo sapiens GN=DNAJA1 PE=1 SV=2 - [DNJA1_HUMAN]	0.2494	1	7	7	15	9909000	7	6	8	7	0.2494	0.2292	25.92	205.25	397	44.8	7.08
P30041	Peroxiredoxin-6 OS=Homo sapiens GN=PRDX6 PE=1 SV=3 - [PRDX6_HUMAN]	0.2902	1	5	5	9	9796000	4	4	4	5	0.1964	0.2589	9.53	132.96	224	25	6.38
P11233	Ras-related protein Ral-A OS=Homo sapiens GN=RALA PE=1 SV=1 - [RALA_HUMAN]	0.2282	2	4	4	12	9597000	4	4	6	6	0.2282	0.2282	18.66	265.24	206	23.6	7.11
P09936	Ubiquitin carboxyl-terminal hydrolase isozyme L1 OS=Homo sapiens GN=UCHL1 PE=1 SV=2 - [UCHL1_HUMAN]	0.1256	1	2	2	8	9418000	2	2	4	4	0.1256	0.1256	16	169.57	223	24.8	5.48
P14209	CD99 antigen OS=Homo sapiens GN=CD99 PE=1 SV=1 - [CD99_HUMAN]	0.0757	1	1	1	4	9346000	1	1	2	2	0.0757	0.0757	9.15	163.23	185	18.8	4.75
P09382	Galectin-1 OS=Homo sapiens GN=LGALS1 PE=1 SV=2 - [LEG1_HUMAN]	0.3259	1	4	4	11	9235000	4	4	5	6	0.3259	0.3259	14.34	128.38	135	14.7	5.5
P09211	Glutathione S-transferase P OS=Homo sapiens GN=GSTP1 PE=1 SV=2 - [GSTP1_HUMAN]	0.3095	1	4	4	12	8862000	4	4	6	6	0.3095	0.3095	21.24	221.82	210	23.3	5.64
P84095	Rho-related GTP-binding protein RhoG OS=Homo sapiens GN=RHOG PE=1 SV=1 - [RHOG_HUMAN]	0.4031	3	4	5	10	8827000	5	5	5	5	0.4031	0.4031	18.15	205.34	191	21.3	8.12
P29966	Myristoylated alanine-rich C-kinase substrate OS=Homo sapiens GN=MARCKS PE=1 SV=4 - [MARCS_HUMAN]	0.3494	1	5	5	16	8726000	5	5	8	8	0.3494	0.3494	25.37	235.5	332	31.5	4.45
P04075	Fructose-bisphosphate aldolase A OS=Homo sapiens GN=ALDOA PE=1 SV=2 - [ALDOA_HUMAN]	0.1676	1	7	7	14	8724000	7	7	7	7	0.1676	0.1676	18.59	238.32	364	39.4	8.09
P80723	Brain acid soluble protein 1 OS=Homo sapiens GN=BASP1 PE=1 SV=2 - [BASP1_HUMAN]	0.674	1	11	11	29	8720000	11	11	14	15	0.674	0.674	46.7	427.02	227	22.7	4.63
Q15113	Procollagen C-endopeptidase enhancer 1 OS=Homo sapiens GN=PCOLCE PE=1 SV=2 - [PCOC1_HUMAN]	0.1982	1	6	6	13	8676000	5	6	6	7	0.1759	0.1982	22.23	270.83	449	47.9	7.43
P22626	Heterogeneous nuclear ribonucleoproteins A2/B1 OS=Homo sapiens GN=HNRNPA2B1 PE=1 SV=2 - [ROA2_HUMAN]	0.2465	2	6	8	16	8527000	7	7	8	8	0.204	0.2266	19.67	205.35	353	37.4	8.95
Q9Y3L5	Ras-related protein Rap-2c OS=Homo sapiens GN=RAP2C PE=1 SV=1 - [RAP2C_HUMAN]	0.2514	3	2	4	8	8526000	4	4	4	4	0.2514	0.2514	10.43	100.1	183	20.7	4.94
Q96HU8	GTP-binding protein Di-Ras2 OS=Homo sapiens GN=DIRAS2 PE=1 SV=1 - [DIRA2_HUMAN]	0.0553	1	1	1	2	8321000	1	1	1	1	0.0553	0.0553	3.1	39.76	199	22.5	8.76
Q9H4M9	EH domain-containing protein 1 OS=Homo sapiens GN=EHD1 PE=1 SV=2 - [EHD1_HUMAN]	0.2397	3	9	9	18	8143000	9	7	10	8	0.2397	0.1667	27.58	232.49	534	60.6	6.83
P12277	Creatine kinase B-type OS=Homo sapiens GN=CKB PE=1 SV=1 - [KCRB_HUMAN]	0.3018	1	8	8	20	8046000	8	8	10	10	0.3018	0.3018	29.11	317.83	381	42.6	5.59
P18669	Phosphoglycerate mutase 1 OS=Homo sapiens GN=PGAM1 PE=1 SV=2 - [PGAM1_HUMAN]	0.189	3	3	3	8	8036000	3	3	4	4	0.189	0.189	10	135.3	254	28.8	7.18
O95297	Myelin protein zero-like protein 1 OS=Homo sapiens GN=MPZL1 PE=1 SV=1 - [MPZL1_HUMAN]	0.1747	1	4	4	10	7956000	4	4	5	5	0.1747	0.1747	13.45	122.37	269	29.1	8.72
P61769	Beta-2-microglobulin OS=Homo sapiens GN=B2M PE=1 SV=1 - [B2MG_HUMAN]	0.1681	1	2	2	8	7702000	2	2	4	4	0.1681	0.1681	12.27	88.33	119	13.7	6.52
P50502	Hsc70-interacting protein OS=Homo sapiens GN=ST13 PE=1 SV=2 - [F10A1_HUMAN]	0.0976	3	3	3	6	7215000	3	3	3	3	0.0976	0.0976	11.47	196.5	369	41.3	5.27
P62942	Peptidyl-prolyl cis-trans isomerase FKBP1A OS=Homo sapiens GN=FKBP1A PE=1 SV=2 - [FKB1A_HUMAN]	0.1204	1	1	1	1	6963000		1		1		0.1204		45.09	108	11.9	8.16
Q12841	Follistatin-related protein 1 OS=Homo sapiens GN=FSTL1 PE=1 SV=1 - [FSTL1_HUMAN]	0.2208	1	6	6	17	6649000	6	6	9	8	0.2208	0.2208	26.63	265.64	308	35	5.52
P63092	Guanine nucleotide-binding protein G(s) subunit alpha isoforms short OS=Homo sapiens GN=GNAS PE=1 SV=1 - [GNAS2_HUMAN]	0.198	8	6	7	16	6589000	7	7	8	8	0.198	0.198	22.36	141.1	394	45.6	5.82
P30086	Phosphatidylethanolamine-binding protein 1 OS=Homo sapiens GN=PEBP1 PE=1 SV=3 - [PEBP1_HUMAN]	0.3529	1	5	5	14	6557000	5	5	7	7	0.3529	0.3529	16.93	153.42	187	21	7.53
P60660	Myosin light polypeptide 6 OS=Homo sapiens GN=MYL6 PE=1 SV=2 - [MYL6_HUMAN]	0.3113	4	4	4	8	6425000	4	4	4	4	0.3113	0.3113	11.67	125.52	151	16.9	4.65
Q14344	Guanine nucleotide-binding protein subunit alpha-13 OS=Homo sapiens GN=GNA13 PE=1 SV=2 - [GNA13_HUMAN]	0.0743	7	1	2	4	6308000	2	2	2	2	0.0743	0.0743	6.59	59.96	377	44	8
O14745	Na(+)/H(+) exchange regulatory cofactor NHE-RF1 OS=Homo sapiens GN=SLC9A3R1 PE=1 SV=4 - [NHRF1_HUMAN]	0.0391	1	1	1	2	6034000	1	1	1	1	0.0391	0.0391	3.65	54.11	358	38.8	5.77
P58546	Myotrophin OS=Homo sapiens GN=MTPN PE=1 SV=2 - [MTPN_HUMAN]	0.1441	1	1	1	2	5805000	1	1	1	1	0.1441	0.1441	4.67	72.56	118	12.9	5.52
Q15365	Poly(rC)-binding protein 1 OS=Homo sapiens GN=PCBP1 PE=1 SV=2 - [PCBP1_HUMAN]	0.2079	1	3	5	11	5798000	5	4	6	5	0.2079	0.1685	16.09	139.36	356	37.5	7.09
P53985	Monocarboxylate transporter 1 OS=Homo sapiens GN=SLC16A1 PE=1 SV=3 - [MOT1_HUMAN]	0.058	1	2	2	6	5792000	2	2	3	3	0.058	0.058	10.21	88.94	500	53.9	8.66
P35221	Catenin alpha-1 OS=Homo sapiens GN=CTNNA1 PE=1 SV=1 - [CTNA1_HUMAN]	0.2031	3	14	14	29	5591000	14	13	15	14	0.2031	0.1932	40.97	417.88	906	100	6.29
P50995	Annexin A11 OS=Homo sapiens GN=ANXA11 PE=1 SV=1 - [ANX11_HUMAN]	0.2158	1	9	9	17	5537000	9	8	9	8	0.2158	0.1921	28.53	336.69	505	54.4	7.65
Q16563	Synaptophysin-like protein 1 OS=Homo sapiens GN=SYPL1 PE=1 SV=1 - [SYPL1_HUMAN]	0.0425	1	1	1	2	5382000	1	1	1	1	0.0425	0.0425	2.45	54.29	259	28.5	8.43
P08648	Integrin alpha-5 OS=Homo sapiens GN=ITGA5 PE=1 SV=2 - [ITA5_HUMAN]	0.081	1	7	7	13	5269000	7	6	7	6	0.081	0.0705	18.32	215.11	1049	114.5	5.77
P13804	Electron transfer flavoprotein subunit alpha, mitochondrial OS=Homo sapiens GN=ETFA PE=1 SV=1 - [ETFA_HUMAN]	0.0571	1	1	1	2	5252000	1	1	1	1	0.0571	0.0571	3.79	47.7	333	35.1	8.38
O00299	Chloride intracellular channel protein 1 OS=Homo sapiens GN=CLIC1 PE=1 SV=4 - [CLIC1_HUMAN]	0.3485	1	4	4	15	5199000	4	4	8	7	0.3485	0.3485	22.37	156.25	241	26.9	5.17
P09651	Heterogeneous nuclear ribonucleoprotein A1 OS=Homo sapiens GN=HNRNPA1 PE=1 SV=5 - [ROA1_HUMAN]	0.1532	3	3	5	9	5158000	5	4	5	4	0.1532	0.1344	15.6	231.41	372	38.7	9.13
Q13308	Inactive tyrosine-protein kinase 7 OS=Homo sapiens GN=PTK7 PE=1 SV=2 - [PTK7_HUMAN]	0.0617	1	5	5	9	5131000	5	4	5	4	0.0617	0.0421	12.16	119.32	1070	118.3	7.09
P01834	Ig kappa chain C region OS=Homo sapiens GN=IGKC PE=1 SV=1 - [IGKC_HUMAN]	0.3585	1	2	2	8	5044000	2	2	4	4	0.3585	0.3585	13.52	108.78	106	11.6	5.87
P11047	Laminin subunit gamma-1 OS=Homo sapiens GN=LAMC1 PE=1 SV=3 - [LAMC1_HUMAN]	0.1336	1	16	16	43	4974000	16	16	22	21	0.1336	0.1336	64.51	785.79	1609	177.5	5.12
P04114	Apolipoprotein B-100 OS=Homo sapiens GN=APOB PE=1 SV=2 - [APOB_HUMAN]	0.0392	1	14	15	29	4973000	13	14	14	15	0.0355	0.0348	38.82	424.58	4563	515.3	7.05
P01111	GTPase NRas OS=Homo sapiens GN=NRAS PE=1 SV=1 - [RASN_HUMAN]	0.2381	3	4	4	8	4966000	4	4	4	4	0.2381	0.2381	10.96	125.86	189	21.2	5.17
Q99497	Protein DJ-1 OS=Homo sapiens GN=PARK7 PE=1 SV=2 - [PARK7_HUMAN]	0.1534	1	2	2	4	4952000	2	2	2	2	0.1534	0.1534	4.58	43.35	189	19.9	6.79
P68104	Elongation factor 1-alpha 1 OS=Homo sapiens GN=EEF1A1 PE=1 SV=1 - [EF1A1_HUMAN]	0.0433	3	2	2	3	4901000	2	1	2	1	0.0433	0.0238	4.82	44.89	462	50.1	9.01
P04264	Keratin, type II cytoskeletal 1 OS=Homo sapiens GN=KRT1 PE=1 SV=6 - [K2C1_HUMAN]	0.1351	2	6	7	14	4776000	7	7	7	7	0.1351	0.1351	24.66	400.43	644	66	8.12
P04275	von Willebrand factor OS=Homo sapiens GN=VWF PE=1 SV=4 - [VWF_HUMAN]	0.0224	1	4	4	8	4741000	4	4	4	4	0.0224	0.0224	13.85	135.72	2813	309.1	5.48
P62873	Guanine nucleotide-binding protein G(I)/G(S)/G(T) subunit beta-1 OS=Homo sapiens GN=GNB1 PE=1 SV=3 - [GBB1_HUMAN]	0.1206	3	2	3	6	4307000	3	3	3	3	0.1206	0.1206	10.82	120.75	340	37.4	6
Q02818	Nucleobindin-1 OS=Homo sapiens GN=NUCB1 PE=1 SV=4 - [NUCB1_HUMAN]	0.1887	1	7	7	16	4305000	7	7	8	8	0.1887	0.1887	23.28	195.32	461	53.8	5.25
P16949	Stathmin OS=Homo sapiens GN=STMN1 PE=1 SV=3 - [STMN1_HUMAN]	0.443	3	7	7	15	4304000	7	6	8	7	0.443	0.4027	21.6	187.33	149	17.3	5.97
P07195	L-lactate dehydrogenase B chain OS=Homo sapiens GN=LDHB PE=1 SV=2 - [LDHB_HUMAN]	0.1707	4	5	5	10	4266000	5	5	5	5	0.1707	0.1707	13.94	143.64	334	36.6	6.05
P61088	Ubiquitin-conjugating enzyme E2 N OS=Homo sapiens GN=UBE2N PE=1 SV=1 - [UBE2N_HUMAN]	0.1645	2	2	2	5	4255000	1	2	2	3	0.0987	0.1645	7.32	80.04	152	17.1	6.57
Q9H4G4	Golgi-associated plant pathogenesis-related protein 1 OS=Homo sapiens GN=GLIPR2 PE=1 SV=3 - [GAPR1_HUMAN]	0.0844	1	1	1	2	4182000	1	1	1	1	0.0844	0.0844	2.72	48.4	154	17.2	9.41
Q12846	Syntaxin-4 OS=Homo sapiens GN=STX4 PE=1 SV=2 - [STX4_HUMAN]	0.1852	1	4	4	10	4181000	4	4	5	5	0.1852	0.1852	15.05	104.92	297	34.2	6.28
Q7L9L4	MOB kinase activator 1B OS=Homo sapiens GN=MOB1B PE=1 SV=3 - [MOB1B_HUMAN]	0.1065	2	2	2	4	4015000	2	2	2	2	0.1065	0.1065	5.74	81.51	216	25.1	6.73
P29692	Elongation factor 1-delta OS=Homo sapiens GN=EEF1D PE=1 SV=5 - [EF1D_HUMAN]	0.1708	1	3	3	6	3743000	3	3	3	3	0.1708	0.1708	9.15	147.21	281	31.1	5.01
Q15599	Na(+)/H(+) exchange regulatory cofactor NHE-RF2 OS=Homo sapiens GN=SLC9A3R2 PE=1 SV=2 - [NHRF2_HUMAN]	0.1573	1	4	4	8	3692000	4	4	4	4	0.1573	0.1573	10.06	126.06	337	37.4	7.93
P26038	Moesin OS=Homo sapiens GN=MSN PE=1 SV=3 - [MOES_HUMAN]	0.1109	1	3	6	10	3486000	5	5	5	5	0.0988	0.0901	13.23	180.52	577	67.8	6.4
P35241	Radixin OS=Homo sapiens GN=RDX PE=1 SV=1 - [RADI_HUMAN]	0.0892	1	2	5	8	3467000	4	4	4	4	0.0772	0.072	12.91	164.73	583	68.5	6.37
P63208	S-phase kinase-associated protein 1 OS=Homo sapiens GN=SKP1 PE=1 SV=2 - [SKP1_HUMAN]	0.2025	1	3	3	8	3453000	3	3	4	4	0.2025	0.2025	10.58	99.1	163	18.6	4.54
P04216	Thy-1 membrane glycoprotein OS=Homo sapiens GN=THY1 PE=1 SV=2 - [THY1_HUMAN]	0.0932	1	1	1	4	3453000	1	1	2	2	0.0932	0.0932	5.24	27.69	161	17.9	8.73
P35908	Keratin, type II cytoskeletal 2 epidermal OS=Homo sapiens GN=KRT2 PE=1 SV=2 - [K22E_HUMAN]	0.0595	7	2	3	6	3360000	3	3	3	3	0.0595	0.0595	9.58	116.38	639	65.4	8
P52565	Rho GDP-dissociation inhibitor 1 OS=Homo sapiens GN=ARHGDIA PE=1 SV=3 - [GDIR1_HUMAN]	0.152	1	2	2	4	3350000	2	2	2	2	0.152	0.152	8.42	130.22	204	23.2	5.11
O75781	Paralemmin-1 OS=Homo sapiens GN=PALM PE=1 SV=2 - [PALM_HUMAN]	0.1008	1	2	2	4	3306000	2	2	2	2	0.1008	0.1008	8.01	95.48	387	42.1	5
P10301	Ras-related protein R-Ras OS=Homo sapiens GN=RRAS PE=1 SV=1 - [RRAS_HUMAN]	0.2523	1	2	4	8	3283000	4	4	4	4	0.2523	0.2523	13.42	172.77	218	23.5	6.93
P35527	Keratin, type I cytoskeletal 9 OS=Homo sapiens GN=KRT9 PE=1 SV=3 - [K1C9_HUMAN]	0.1814	1	6	6	14	3243000	6	6	7	7	0.1814	0.1814	23.24	276.53	623	62	5.24
Q08431	Lactadherin OS=Homo sapiens GN=MFGE8 PE=1 SV=2 - [MFGM_HUMAN]	0.1137	1	4	4	7	3145000	3	4	3	4	0.093	0.1137	7.7	55.47	387	43.1	8.15
P31948	Stress-induced-phosphoprotein 1 OS=Homo sapiens GN=STIP1 PE=1 SV=1 - [STIP1_HUMAN]	0.0608	1	3	3	6	3108000	3	3	3	3	0.0608	0.0608	9.05	90.9	543	62.6	6.8
P62879	Guanine nucleotide-binding protein G(I)/G(S)/G(T) subunit beta-2 OS=Homo sapiens GN=GNB2 PE=1 SV=3 - [GBB2_HUMAN]	0.1206	3	2	3	6	3045000	3	3	3	3	0.1206	0.1206	9.55	148.49	340	37.3	6
P14543	Nidogen-1 OS=Homo sapiens GN=NID1 PE=1 SV=3 - [NID1_HUMAN]	0.0176	1	2	2	4	2965000	2	2	2	2	0.0176	0.0176	5.44	75.68	1247	136.3	5.29
P55209	Nucleosome assembly protein 1-like 1 OS=Homo sapiens GN=NAP1L1 PE=1 SV=1 - [NP1L1_HUMAN]	0.0895	1	2	2	3	2837000	2	1	2	1	0.0895	0.0435	3.15	52.23	391	45.3	4.46
P07942	Laminin subunit beta-1 OS=Homo sapiens GN=LAMB1 PE=1 SV=2 - [LAMB1_HUMAN]	0.0386	1	6	6	13	2829000	6	5	7	6	0.0386	0.0342	22.18	154.53	1786	197.9	4.94
P54709	Sodium/potassium-transporting ATPase subunit beta-3 OS=Homo sapiens GN=ATP1B3 PE=1 SV=1 - [AT1B3_HUMAN]	0.1039	1	2	2	4	2724000	2	2	2	2	0.1039	0.1039	5.93	45.57	279	31.5	8.35
P18827	Syndecan-1 OS=Homo sapiens GN=SDC1 PE=1 SV=3 - [SDC1_HUMAN]	0.1161	1	2	2	6	2661000	2	2	3	3	0.1161	0.1161	10.42	114.56	310	32.4	4.63
Q8N2S1	Latent-transforming growth factor beta-binding protein 4 OS=Homo sapiens GN=LTBP4 PE=1 SV=2 - [LTBP4_HUMAN]	0.0456	1	5	5	10	2624000	5	4	6	4	0.0456	0.0382	19.17	161.31	1624	173.3	5.43
O00161	Synaptosomal-associated protein 23 OS=Homo sapiens GN=SNAP23 PE=1 SV=1 - [SNP23_HUMAN]	0.2796	1	4	4	10	2614000	4	4	5	5	0.2796	0.2796	12.87	104.48	211	23.3	5.01
Q14108	Lysosome membrane protein 2 OS=Homo sapiens GN=SCARB2 PE=1 SV=2 - [SCRB2_HUMAN]	0.0732	1	4	4	10	2597000	4	4	5	5	0.0732	0.0732	15.54	175.33	478	54.3	5.14
P24534	Elongation factor 1-beta OS=Homo sapiens GN=EEF1B2 PE=1 SV=3 - [EF1B_HUMAN]	0.1244	1	2	2	4	2594000	2	2	2	2	0.1244	0.1244	7.72	109.95	225	24.7	4.67
P40925	Malate dehydrogenase, cytoplasmic OS=Homo sapiens GN=MDH1 PE=1 SV=4 - [MDHC_HUMAN]	0.0749	1	2	2	4	2539000	2	2	2	2	0.0749	0.0749	5.54	69.09	334	36.4	7.36
P13645	Keratin, type I cytoskeletal 10 OS=Homo sapiens GN=KRT10 PE=1 SV=6 - [K1C10_HUMAN]	0.0274	17	2	2	3	2510000	1	2	1	2	0.0154	0.0274	2.74	51.91	584	58.8	5.21
P00558	Phosphoglycerate kinase 1 OS=Homo sapiens GN=PGK1 PE=1 SV=3 - [PGK1_HUMAN]	0.1918	1	5	5	12	2505000	5	4	7	5	0.1918	0.1487	19.42	157.16	417	44.6	8.1
O60716	Catenin delta-1 OS=Homo sapiens GN=CTNND1 PE=1 SV=1 - [CTND1_HUMAN]	0.0434	1	4	4	7	2351000	3	4	3	4	0.032	0.0434	4.84	57.6	968	108.1	6.23
P20073	Annexin A7 OS=Homo sapiens GN=ANXA7 PE=1 SV=3 - [ANXA7_HUMAN]	0.082	1	3	3	6	2297000	3	3	3	3	0.082	0.082	9.29	106.41	488	52.7	5.68
O14791	Apolipoprotein L1 OS=Homo sapiens GN=APOL1 PE=1 SV=5 - [APOL1_HUMAN]	0.0377	1	1	1	2	2170000	1	1	1	1	0.0377	0.0377	3.51	53.42	398	43.9	5.81
Q9Y696	Chloride intracellular channel protein 4 OS=Homo sapiens GN=CLIC4 PE=1 SV=4 - [CLIC4_HUMAN]	0.2095	1	4	4	9	2141000	4	4	5	4	0.2095	0.2095	11.25	87.76	253	28.8	5.59
P01877	Ig alpha-2 chain C region OS=Homo sapiens GN=IGHA2 PE=1 SV=3 - [IGHA2_HUMAN]	0.0794	2	2	2	4	2135000	2	2	2	2	0.0794	0.0794	5.82	90.75	340	36.5	6.1
Q53EZ4	Centrosomal protein of 55 kDa OS=Homo sapiens GN=CEP55 PE=1 SV=3 - [CEP55_HUMAN]	0.0323	1	1	1	2	2072000	1	1	1	1	0.0323	0.0323	4.7	77.79	464	54.1	7.01
P63218	Guanine nucleotide-binding protein G(I)/G(S)/G(O) subunit gamma-5 OS=Homo sapiens GN=GNG5 PE=1 SV=3 - [GBG5_HUMAN]	0.2353	1	2	2	3	2017000	2	1	2	1	0.2353	0.1324	5.31	44.3	68	7.3	9.85
P06744	Glucose-6-phosphate isomerase OS=Homo sapiens GN=GPI PE=1 SV=4 - [G6PI_HUMAN]	0.0269	1	1	1	2	2017000	1	1	1	1	0.0269	0.0269	3.09	56.73	558	63.1	8.32
P23142	Fibulin-1 OS=Homo sapiens GN=FBLN1 PE=1 SV=4 - [FBLN1_HUMAN]	0.0555	1	3	3	4	1955000	1	3	1	3	0.0242	0.0555	2.73	71.36	703	77.2	5.22
P07996	Thrombospondin-1 OS=Homo sapiens GN=THBS1 PE=1 SV=2 - [TSP1_HUMAN]	0.0197	1	2	2	4	1912000	2	2	2	2	0.0197	0.0197	5.14	49.16	1170	129.3	4.94
P08253	72 kDa type IV collagenase OS=Homo sapiens GN=MMP2 PE=1 SV=2 - [MMP2_HUMAN]	0.0833	1	4	4	8	1882000	4	4	4	4	0.0833	0.0833	11.14	93.46	660	73.8	5.47
P38646	Stress-70 protein, mitochondrial OS=Homo sapiens GN=HSPA9 PE=1 SV=2 - [GRP75_HUMAN]	0.0133	1	1	1	2	1852000	1	1	1	1	0.0133	0.0133	2.2	38.89	679	73.6	6.16
Q96FZ7	Charged multivesicular body protein 6 OS=Homo sapiens GN=CHMP6 PE=1 SV=3 - [CHMP6_HUMAN]	0.0647	1	1	1	4	1804000	1	1	2	2	0.0647	0.0647	7.83	133.96	201	23.5	5.31
P02647	Apolipoprotein A-I OS=Homo sapiens GN=APOA1 PE=1 SV=1 - [APOA1_HUMAN]	0.1049	1	2	2	6	1793000	2	2	3	3	0.1049	0.1049	9.34	93.9	267	30.8	5.76
P55058	Phospholipid transfer protein OS=Homo sapiens GN=PLTP PE=1 SV=1 - [PLTP_HUMAN]	0.0243	1	1	1	2	1792000	1	1	1	1	0.0243	0.0243	3.8	72.71	493	54.7	7.01
O75347	Tubulin-specific chaperone A OS=Homo sapiens GN=TBCA PE=1 SV=3 - [TBCA_HUMAN]	0.0926	1	1	1	2	1714000	1	1	1	1	0.0926	0.0926	2.68	48.21	108	12.8	5.29
P04004	Vitronectin OS=Homo sapiens GN=VTN PE=1 SV=1 - [VTNC_HUMAN]	0.0314	1	1	1	2	1708000	1	1	1	1	0.0314	0.0314	2.66	31.57	478	54.3	5.8
P27105	Erythrocyte band 7 integral membrane protein OS=Homo sapiens GN=STOM PE=1 SV=3 - [STOM_HUMAN]	0.2153	1	4	4	7	1591000	4	3	4	3	0.2153	0.1424	9.87	124.64	288	31.7	7.88
Q9BX67	Junctional adhesion molecule C OS=Homo sapiens GN=JAM3 PE=1 SV=1 - [JAM3_HUMAN]	0.0581	1	1	1	2	1414000	1	1	1	1	0.0581	0.0581	4.46	57.41	310	35	7.59
Q16543	Hsp90 co-chaperone Cdc37 OS=Homo sapiens GN=CDC37 PE=1 SV=1 - [CDC37_HUMAN]	0.1296	1	3	3	8	1412000	3	3	4	4	0.1296	0.1296	10.43	105.27	378	44.4	5.25
Q9ULC3	Ras-related protein Rab-23 OS=Homo sapiens GN=RAB23 PE=1 SV=1 - [RAB23_HUMAN]	0.0675	1	1	1	2	1388000	1	1	1	1	0.0675	0.0675	4.44	58.7	237	26.6	6.6
P20908	Collagen alpha-1(V) chain OS=Homo sapiens GN=COL5A1 PE=1 SV=3 - [CO5A1_HUMAN]	0.019	1	3	3	5	1238000	3	2	3	2	0.019	0.0131	7.47	34.31	1838	183.4	5.06
P18206	Vinculin OS=Homo sapiens GN=VCL PE=1 SV=4 - [VINC_HUMAN]	0.045	1	4	4	8	1224000	4	4	4	4	0.045	0.045	11.54	141.68	1134	123.7	5.66
P09972	Fructose-bisphosphate aldolase C OS=Homo sapiens GN=ALDOC PE=1 SV=2 - [ALDOC_HUMAN]	0.0632	1	1	1	2	1208000	1	1	1	1	0.0632	0.0632	1.71	27.66	364	39.4	6.87
P10909	Clusterin OS=Homo sapiens GN=CLU PE=1 SV=1 - [CLUS_HUMAN]	0.0646	1	2	2	4	1183000	2	2	2	2	0.0646	0.0646	6.43	89.05	449	52.5	6.27
P60981	Destrin OS=Homo sapiens GN=DSTN PE=1 SV=3 - [DEST_HUMAN]	0.1455	1	2	2	4	1155000	2	2	2	2	0.1455	0.1455	5.91	79.91	165	18.5	7.85
P37802	Transgelin-2 OS=Homo sapiens GN=TAGLN2 PE=1 SV=3 - [TAGL2_HUMAN]	0.0553	1	1	1	2	1103000	1	1	1	1	0.0553	0.0553	2.27	27.79	199	22.4	8.25
P05067	Amyloid beta A4 protein OS=Homo sapiens GN=APP PE=1 SV=3 - [A4_HUMAN]	0.0532	1	3	3	6	983200	3	2	4	2	0.0532	0.0325	10.67	76.45	770	86.9	4.82
P02656	Apolipoprotein C-III OS=Homo sapiens GN=APOC3 PE=1 SV=1 - [APOC3_HUMAN]	0.1616	1	1	1	2	952800	1	1	1	1	0.1616	0.1616	3.34	75.62	99	10.8	5.41
P61026	Ras-related protein Rab-10 OS=Homo sapiens GN=RAB10 PE=1 SV=1 - [RAB10_HUMAN]	0.115	1	2	2	4	762900	2	2	2	2	0.115	0.115	6.84	77.41	200	22.5	8.38
Q15286	Ras-related protein Rab-35 OS=Homo sapiens GN=RAB35 PE=1 SV=1 - [RAB35_HUMAN]	0.0498	1	1	1	2	728700	1	1	1	1	0.0498	0.0498	2.92	45.44	201	23	8.29
O75695	Protein XRP2 OS=Homo sapiens GN=RP2 PE=1 SV=4 - [XRP2_HUMAN]	0.0343	1	1	1	2	696500	1	1	1	1	0.0343	0.0343	3.2	31.63	350	39.6	5.12
A6NDB9	Paralemmin-3 OS=Homo sapiens GN=PALM3 PE=1 SV=2 - [PALM3_HUMAN]	0.0253	1	1	1	2	695600	1	1	1	1	0.0253	0.0253	3.32	42.1	673	71.7	4.53
O15230	Laminin subunit alpha-5 OS=Homo sapiens GN=LAMA5 PE=1 SV=8 - [LAMA5_HUMAN]	0.0106	1	3	3	6	692600	3	3	3	3	0.0106	0.0106	8.85	101.49	3695	399.5	7.02
P14550	Alcohol dehydrogenase [NADP(+)] OS=Homo sapiens GN=AKR1A1 PE=1 SV=3 - [AK1A1_HUMAN]	0.0585	1	1	1	1	449100	1		1		0.0585		1.72		325	36.5	6.79

## Sheet: HS-SY-II
Supplementary Table 1-2. List of proteins included in the EVs secreted from HS-SY-II cell line
Accession	Description	Sum (Coverage)	Sum (# Proteins)	Sum (# Unique Peptides)	Sum (# Peptides)	Sum (# PSMs)	Area	# Peptides A10	# Peptides A6	# PSM A10	# PSM A6	Coverage A10	Coverage A6	Score A10	Score A6	# AAs	MW [kDa]	calc. pI
P07477	Trypsin-1 OS=Homo sapiens GN=PRSS1 PE=1 SV=1 - [TRY1_HUMAN]	0.0729	2	2	2	90	835900000	2	1	45	45	0.0729	0.0405	106.68	678.07	247	26.5	6.51
P80723	Brain acid soluble protein 1 OS=Homo sapiens GN=BASP1 PE=1 SV=2 - [BASP1_HUMAN]	0.7533	1	14	14	44	151400000	12	12	23	21	0.6916	0.6916	68.22	444.81	227	22.7	4.63
P04264	Keratin, type II cytoskeletal 1 OS=Homo sapiens GN=KRT1 PE=1 SV=6 - [K2C1_HUMAN]	0.3882	3	18	24	72	118600000	23	22	38	34	0.3866	0.3742	122.71	1383.7	644	66	8.12
P35908	Keratin, type II cytoskeletal 2 epidermal OS=Homo sapiens GN=KRT2 PE=1 SV=2 - [K22E_HUMAN]	0.3318	7	13	19	40	61700000	18	18	21	19	0.3177	0.3318	66.18	774.32	639	65.4	8
P35527	Keratin, type I cytoskeletal 9 OS=Homo sapiens GN=KRT9 PE=1 SV=3 - [K1C9_HUMAN]	0.4543	1	20	20	50	57880000	16	20	24	26	0.4013	0.4543	71.5	971.24	623	62	5.24
P02768	Serum albumin OS=Homo sapiens GN=ALB PE=1 SV=2 - [ALBU_HUMAN]	0.1741	1	11	11	25	44780000	9	11	11	14	0.1478	0.1741	31.76	384.69	609	69.3	6.28
P29966	Myristoylated alanine-rich C-kinase substrate OS=Homo sapiens GN=MARCKS PE=1 SV=4 - [MARCS_HUMAN]	0.4006	1	6	6	22	36860000	6	6	11	11	0.4006	0.4006	39.91	379.58	332	31.5	4.45
O60814	Histone H2B type 1-K OS=Homo sapiens GN=HIST1H2BK PE=1 SV=3 - [H2B1K_HUMAN]	0.2778	15	3	3	7	32380000	1	3	3	4	0.119	0.2778	9.04	84.47	126	13.9	10.32
Q96KK5	Histone H2A type 1-H OS=Homo sapiens GN=HIST1H2AH PE=1 SV=3 - [H2A1H_HUMAN]	0.2734	15	3	3	7	31570000	2	3	3	4	0.2188	0.2734	7.65	58.42	128	13.9	10.89
P60709	Actin, cytoplasmic 1 OS=Homo sapiens GN=ACTB PE=1 SV=1 - [ACTB_HUMAN]	0.296	7	3	9	22	26870000	8	9	10	12	0.2693	0.296	28.46	339.75	375	41.7	5.48
P63104	14-3-3 protein zeta/delta OS=Homo sapiens GN=YWHAZ PE=1 SV=1 - [1433Z_HUMAN]	0.3714	1	8	9	22	23710000	8	8	11	11	0.3388	0.3388	34.36	442.68	245	27.7	4.79
P0CG48	Polyubiquitin-C OS=Homo sapiens GN=UBC PE=1 SV=3 - [UBC_HUMAN]	0.4467	4	3	3	6	22250000	3	3	3	3	0.4467	0.4467	8.65	89.74	685	77	7.66
P62937	Peptidyl-prolyl cis-trans isomerase A OS=Homo sapiens GN=PPIA PE=1 SV=2 - [PPIA_HUMAN]	0.2606	1	5	5	8	21880000	5	3	5	3	0.2606	0.1879	13.31	133.66	165	18	7.81
P16401	Histone H1.5 OS=Homo sapiens GN=HIST1H1B PE=1 SV=3 - [H15_HUMAN]	0.2124	1	4	4	6	20610000	3	3	3	3	0.1416	0.1593	7.49	133.14	226	22.6	10.92
P13645	Keratin, type I cytoskeletal 10 OS=Homo sapiens GN=KRT10 PE=1 SV=6 - [K1C10_HUMAN]	0.3801	17	16	18	37	20480000	16	17	18	19	0.3219	0.3784	61.18	792.03	584	58.8	5.21
P62805	Histone H4 OS=Homo sapiens GN=HIST1H4A PE=1 SV=2 - [H4_HUMAN]	0.5049	1	5	5	10	20290000	5	5	5	5	0.5049	0.5049	14.37	171.55	103	11.4	11.36
Q96HU8	GTP-binding protein Di-Ras2 OS=Homo sapiens GN=DIRAS2 PE=1 SV=1 - [DIRA2_HUMAN]	0.0553	1	1	1	2	15980000	1	1	1	1	0.0553	0.0553	3.1	48.57	199	22.5	8.76
P61224	Ras-related protein Rap-1b OS=Homo sapiens GN=RAP1B PE=1 SV=1 - [RAP1B_HUMAN]	0.3152	4	6	6	17	15830000	6	6	9	8	0.3152	0.3152	25.89	234.16	184	20.8	5.78
Q9UBI6	Guanine nucleotide-binding protein G(I)/G(S)/G(O) subunit gamma-12 OS=Homo sapiens GN=GNG12 PE=1 SV=3 - [GBG12_HUMAN]	0.4167	1	2	2	4	15740000	2	2	2	2	0.4167	0.4167	5.3	56.58	72	8	8.97
P60033	CD81 antigen OS=Homo sapiens GN=CD81 PE=1 SV=1 - [CD81_HUMAN]	0.25	1	3	3	9	14610000	3	3	5	4	0.25	0.25	14.58	132.21	236	25.8	5.29
P11142	Heat shock cognate 71 kDa protein OS=Homo sapiens GN=HSPA8 PE=1 SV=1 - [HSP7C_HUMAN]	0.3019	3	14	15	40	14600000	14	15	20	20	0.2895	0.3019	59.27	604.61	646	70.9	5.52
P02649	Apolipoprotein E OS=Homo sapiens GN=APOE PE=1 SV=1 - [APOE_HUMAN]	0.3249	1	8	8	22	12900000	8	8	11	11	0.3249	0.3249	33.39	388.5	317	36.1	5.73
Q6NXT2	Histone H3.3C OS=Homo sapiens GN=H3F3C PE=1 SV=3 - [H3C_HUMAN]	0.0667	5	1	1	2	12710000	1	1	1	1	0.0667	0.0667	2.47	33.78	135	15.2	11.11
P35613	Basigin OS=Homo sapiens GN=BSG PE=1 SV=2 - [BASI_HUMAN]	0.2208	1	7	7	27	10900000	7	7	14	13	0.2208	0.2208	41.79	299.09	385	42.2	5.66
P21741	Midkine OS=Homo sapiens GN=MDK PE=1 SV=1 - [MK_HUMAN]	0.3077	1	3	3	6	10860000	3	3	3	3	0.3077	0.3077	9.88	126.16	143	15.6	9.79
P04406	Glyceraldehyde-3-phosphate dehydrogenase OS=Homo sapiens GN=GAPDH PE=1 SV=3 - [G3P_HUMAN]	0.2507	1	5	5	11	10850000	5	4	6	5	0.2507	0.1881	16.23	174	335	36	8.46
P62158	Calmodulin OS=Homo sapiens GN=CALM1 PE=1 SV=2 - [CALM_HUMAN]	0.443	1	6	6	19	10780000	6	6	10	9	0.443	0.443	22.01	215.25	149	16.8	4.22
P62258	14-3-3 protein epsilon OS=Homo sapiens GN=YWHAE PE=1 SV=1 - [1433E_HUMAN]	0.4431	1	8	9	19	10560000	6	9	8	11	0.3333	0.4431	22.2	335.76	255	29.2	4.74
P15531	Nucleoside diphosphate kinase A OS=Homo sapiens GN=NME1 PE=1 SV=1 - [NDKA_HUMAN]	0.5263	1	3	7	19	10460000	7	6	10	9	0.5263	0.4737	23.55	152.46	152	17.1	6.19
P27348	14-3-3 protein theta OS=Homo sapiens GN=YWHAQ PE=1 SV=1 - [1433T_HUMAN]	0.4245	2	6	8	23	10260000	8	8	12	11	0.4245	0.4245	33.05	397.88	245	27.7	4.78
P13987	CD59 glycoprotein OS=Homo sapiens GN=CD59 PE=1 SV=1 - [CD59_HUMAN]	0.0938	1	1	1	4	10030000	1	1	2	2	0.0938	0.0938	6.36	79.27	128	14.2	6.48
P49006	MARCKS-related protein OS=Homo sapiens GN=MARCKSL1 PE=1 SV=2 - [MRP_HUMAN]	0.4974	1	4	4	8	10020000	4	4	4	4	0.4974	0.4974	13.02	110.06	195	19.5	4.67
P31946	14-3-3 protein beta/alpha OS=Homo sapiens GN=YWHAB PE=1 SV=3 - [1433B_HUMAN]	0.2886	2	3	6	22	9947000	6	6	11	11	0.2886	0.2886	29.16	378.07	246	28.1	4.83
Q06830	Peroxiredoxin-1 OS=Homo sapiens GN=PRDX1 PE=1 SV=1 - [PRDX1_HUMAN]	0.392	2	6	7	13	9576000	5	6	6	7	0.2965	0.3518	15.61	150.73	199	22.1	8.13
P60174	Triosephosphate isomerase OS=Homo sapiens GN=TPI1 PE=1 SV=3 - [TPIS_HUMAN]	0.4336	1	9	9	24	9111000	9	9	11	13	0.4336	0.4336	37.92	389.13	286	30.8	5.92
P13804	Electron transfer flavoprotein subunit alpha, mitochondrial OS=Homo sapiens GN=ETFA PE=1 SV=1 - [ETFA_HUMAN]	0.0571	1	1	1	4	9101000	1	1	2	2	0.0571	0.0571	6.14	74.18	333	35.1	8.38
P61981	14-3-3 protein gamma OS=Homo sapiens GN=YWHAG PE=1 SV=2 - [1433G_HUMAN]	0.3482	2	5	8	30	8977000	8	8	16	14	0.3482	0.3482	39.22	419.66	247	28.3	4.89
P01871	Ig mu chain C region OS=Homo sapiens GN=IGHM PE=1 SV=3 - [IGHM_HUMAN]	0.1305	2	5	5	11	8762000	5	5	6	5	0.1305	0.1305	15.61	172.49	452	49.3	6.77
P01023	Alpha-2-macroglobulin OS=Homo sapiens GN=A2M PE=1 SV=3 - [A2MG_HUMAN]	0.0624	1	7	7	17	8048000	7	6	9	8	0.0624	0.0556	25.99	237.71	1474	163.2	6.46
P69905	Hemoglobin subunit alpha OS=Homo sapiens GN=HBA1 PE=1 SV=2 - [HBA_HUMAN]	0.2817	1	3	3	6	8002000	2	2	3	3	0.2183	0.169	5.92	68.53	142	15.2	8.68
Q04917	14-3-3 protein eta OS=Homo sapiens GN=YWHAH PE=1 SV=4 - [1433F_HUMAN]	0.1707	2	2	4	12	7946000	4	4	6	6	0.1707	0.1707	15.13	188.43	246	28.2	4.84
P04075	Fructose-bisphosphate aldolase A OS=Homo sapiens GN=ALDOA PE=1 SV=2 - [ALDOA_HUMAN]	0.4093	1	9	10	16	7936000	6	10	6	10	0.2225	0.4093	19.04	264.24	364	39.4	8.09
P07355	Annexin A2 OS=Homo sapiens GN=ANXA2 PE=1 SV=2 - [ANXA2_HUMAN]	0.3245	2	9	9	19	7603000	8	9	9	10	0.295	0.3245	26.44	275.33	339	38.6	7.75
P23528	Cofilin-1 OS=Homo sapiens GN=CFL1 PE=1 SV=3 - [COF1_HUMAN]	0.253	1	3	3	9	7216000	3	2	5	4	0.253	0.2048	14.97	118.12	166	18.5	8.09
Q14344	Guanine nucleotide-binding protein subunit alpha-13 OS=Homo sapiens GN=GNA13 PE=1 SV=2 - [GNA13_HUMAN]	0.0743	6	1	2	6	6983000	2	2	3	3	0.0743	0.0743	8.99	86.1	377	44	8
P08107	Heat shock 70 kDa protein 1A/1B OS=Homo sapiens GN=HSPA1A PE=1 SV=5 - [HSP71_HUMAN]	0.2137	2	9	10	25	6887000	10	9	13	12	0.2137	0.1981	38.95	315.5	641	70	5.66
P11047	Laminin subunit gamma-1 OS=Homo sapiens GN=LAMC1 PE=1 SV=3 - [LAMC1_HUMAN]	0.1703	1	21	21	44	6845000	20	20	22	22	0.1653	0.1641	66.48	816.11	1609	177.5	5.12
P08238	Heat shock protein HSP 90-beta OS=Homo sapiens GN=HSP90AB1 PE=1 SV=4 - [HS90B_HUMAN]	0.1809	9	4	11	24	6666000	11	11	12	12	0.1809	0.1809	37.97	448.69	724	83.2	5.03
P50151	Guanine nucleotide-binding protein G(I)/G(S)/G(O) subunit gamma-10 OS=Homo sapiens GN=GNG10 PE=1 SV=1 - [GBG10_HUMAN]	0.2206	1	1	1	2	6581000	1	1	1	1	0.2206	0.2206	2.06	34.26	68	7.2	7.85
P07195	L-lactate dehydrogenase B chain OS=Homo sapiens GN=LDHB PE=1 SV=2 - [LDHB_HUMAN]	0.2216	3	5	6	14	6490000	6	6	7	7	0.2216	0.2216	21.24	207.75	334	36.6	6.05
O00560	Syntenin-1 OS=Homo sapiens GN=SDCBP PE=1 SV=1 - [SDCB1_HUMAN]	0.104	1	2	2	4	6076000	2	2	2	2	0.104	0.104	5.77	87.21	298	32.4	7.53
P63092	Guanine nucleotide-binding protein G(s) subunit alpha isoforms short OS=Homo sapiens GN=GNAS PE=1 SV=1 - [GNAS2_HUMAN]	0.099	7	3	4	10	6023000	4	4	5	5	0.099	0.099	13.26	152.72	394	45.6	5.82
P07737	Profilin-1 OS=Homo sapiens GN=PFN1 PE=1 SV=2 - [PROF1_HUMAN]	0.3429	1	4	4	8	5955000	4	4	4	4	0.3429	0.3429	10.14	115	140	15	8.27
P16949	Stathmin OS=Homo sapiens GN=STMN1 PE=1 SV=3 - [STMN1_HUMAN]	0.349	3	5	5	7	5822000	4	3	4	3	0.2685	0.2215	9.85	111.75	149	17.3	5.97
P07437	Tubulin beta chain OS=Homo sapiens GN=TUBB PE=1 SV=2 - [TBB5_HUMAN]	0.1554	6	1	6	13	5798000	6	6	7	6	0.1554	0.1554	20.3	244.23	444	49.6	4.89
P07900	Heat shock protein HSP 90-alpha OS=Homo sapiens GN=HSP90AA1 PE=1 SV=5 - [HS90A_HUMAN]	0.1612	8	3	10	22	5770000	10	10	11	11	0.1612	0.1612	34.89	385.77	732	84.6	5.02
P32119	Peroxiredoxin-2 OS=Homo sapiens GN=PRDX2 PE=1 SV=5 - [PRDX2_HUMAN]	0.096	1	1	2	3	5614000	1	2	1	2	0.0556	0.096	2.94	76.14	198	21.9	5.97
P04275	von Willebrand factor OS=Homo sapiens GN=VWF PE=1 SV=4 - [VWF_HUMAN]	0.0299	1	6	6	16	5545000	6	6	8	8	0.0299	0.0299	22.76	192.71	2813	309.1	5.48
P62873	Guanine nucleotide-binding protein G(I)/G(S)/G(T) subunit beta-1 OS=Homo sapiens GN=GNB1 PE=1 SV=3 - [GBB1_HUMAN]	0.15	3	2	4	8	5400000	4	4	4	4	0.15	0.15	13.23	165.14	340	37.4	6
P06733	Alpha-enolase OS=Homo sapiens GN=ENO1 PE=1 SV=2 - [ENOA_HUMAN]	0.2005	3	6	6	16	5362000	6	6	8	8	0.2005	0.2005	27.36	312.44	434	47.1	7.39
Q15113	Procollagen C-endopeptidase enhancer 1 OS=Homo sapiens GN=PCOLCE PE=1 SV=2 - [PCOC1_HUMAN]	0.2361	1	7	7	15	5254000	7	6	8	7	0.2361	0.2116	24.39	217.93	449	47.9	7.43
P62879	Guanine nucleotide-binding protein G(I)/G(S)/G(T) subunit beta-2 OS=Homo sapiens GN=GNB2 PE=1 SV=3 - [GBB2_HUMAN]	0.15	3	2	4	8	5131000	4	4	4	4	0.15	0.15	12.76	167.84	340	37.3	6
P18669	Phosphoglycerate mutase 1 OS=Homo sapiens GN=PGAM1 PE=1 SV=2 - [PGAM1_HUMAN]	0.1339	1	2	2	4	5096000	2	2	2	2	0.1339	0.1339	5.21	76.73	254	28.8	7.18
O00299	Chloride intracellular channel protein 1 OS=Homo sapiens GN=CLIC1 PE=1 SV=4 - [CLIC1_HUMAN]	0.3983	1	5	5	21	4974000	5	5	10	11	0.3983	0.3983	31.26	235.51	241	26.9	5.17
P02765	Alpha-2-HS-glycoprotein OS=Homo sapiens GN=AHSG PE=1 SV=1 - [FETUA_HUMAN]	0.0518	1	2	2	3	4930000	1	2	1	2	0.0327	0.0518	3.85	106.9	367	39.3	5.72
P05556	Integrin beta-1 OS=Homo sapiens GN=ITGB1 PE=1 SV=2 - [ITB1_HUMAN]	0.1178	1	8	8	18	4863000	8	8	9	9	0.1178	0.1178	24	195.75	798	88.4	5.39
P12277	Creatine kinase B-type OS=Homo sapiens GN=CKB PE=1 SV=1 - [KCRB_HUMAN]	0.2992	1	8	8	17	4816000	7	8	8	9	0.273	0.2992	19.4	253.34	381	42.6	5.59
P61204	ADP-ribosylation factor 3 OS=Homo sapiens GN=ARF3 PE=1 SV=2 - [ARF3_HUMAN]	0.3204	4	5	5	10	4768000	5	5	5	5	0.3204	0.3204	14.55	159.44	181	20.6	7.43
P12109	Collagen alpha-1(VI) chain OS=Homo sapiens GN=COL6A1 PE=1 SV=3 - [CO6A1_HUMAN]	0.1663	1	11	11	24	4700000	10	11	11	13	0.1527	0.1663	25.65	240.04	1028	108.5	5.43
P30086	Phosphatidylethanolamine-binding protein 1 OS=Homo sapiens GN=PEBP1 PE=1 SV=3 - [PEBP1_HUMAN]	0.3048	1	4	4	7	4698000	3	4	3	4	0.262	0.3048	11.32	177.78	187	21	7.53
P08195	4F2 cell-surface antigen heavy chain OS=Homo sapiens GN=SLC3A2 PE=1 SV=3 - [4F2_HUMAN]	0.146	1	8	8	16	4334000	7	7	8	8	0.1349	0.1333	26.05	334.48	630	68	5.01
P68104	Elongation factor 1-alpha 1 OS=Homo sapiens GN=EEF1A1 PE=1 SV=1 - [EF1A1_HUMAN]	0.119	3	4	4	8	4298000	4	4	4	4	0.119	0.119	10.9	87.58	462	50.1	9.01
P08253	72 kDa type IV collagenase OS=Homo sapiens GN=MMP2 PE=1 SV=2 - [MMP2_HUMAN]	0.153	1	8	8	16	4288000	6	8	7	9	0.1242	0.153	18.67	232.43	660	73.8	5.47
P07942	Laminin subunit beta-1 OS=Homo sapiens GN=LAMB1 PE=1 SV=2 - [LAMB1_HUMAN]	0.0823	1	11	11	24	4253000	11	11	12	12	0.0823	0.0823	35.28	348.56	1786	197.9	4.94
Q15758	Neutral amino acid transporter B(0) OS=Homo sapiens GN=SLC1A5 PE=1 SV=2 - [AAAT_HUMAN]	0.1146	1	5	5	9	4238000	4	5	4	5	0.0961	0.1146	10.17	128.55	541	56.6	5.48
P08962	CD63 antigen OS=Homo sapiens GN=CD63 PE=1 SV=2 - [CD63_HUMAN]	0.042	1	1	1	2	4176000	1	1	1	1	0.042	0.042	2.79	45.78	238	25.6	7.81
P04216	Thy-1 membrane glycoprotein OS=Homo sapiens GN=THY1 PE=1 SV=2 - [THY1_HUMAN]	0.0932	1	1	1	2	4059000	1	1	1	1	0.0932	0.0932	2.97	21.06	161	17.9	8.73
P26038	Moesin OS=Homo sapiens GN=MSN PE=1 SV=3 - [MOES_HUMAN]	0.2357	2	9	12	27	4013000	11	11	13	14	0.2184	0.2201	38.15	418.49	577	67.8	6.4
Q9NZZ3	Charged multivesicular body protein 5 OS=Homo sapiens GN=CHMP5 PE=1 SV=1 - [CHMP5_HUMAN]	0.0731	1	1	1	2	3985000	1	1	1	1	0.0731	0.0731	3.54	35.27	219	24.6	4.83
P09936	Ubiquitin carboxyl-terminal hydrolase isozyme L1 OS=Homo sapiens GN=UCHL1 PE=1 SV=2 - [UCHL1_HUMAN]	0.157	1	2	2	4	3942000	2	2	2	2	0.157	0.157	6.36	72.4	223	24.8	5.48
O00468	Agrin OS=Homo sapiens GN=AGRN PE=1 SV=5 - [AGRIN_HUMAN]	0.1108	1	13	13	26	3853000	12	13	13	13	0.105	0.1108	45.85	484.97	2067	217.1	6.39
P05387	60S acidic ribosomal protein P2 OS=Homo sapiens GN=RPLP2 PE=1 SV=1 - [RLA2_HUMAN]	0.5043	1	3	3	5	3845000	2	3	2	3	0.2174	0.5043	6.45	119.3	115	11.7	4.54
Q92783	Signal transducing adapter molecule 1 OS=Homo sapiens GN=STAM PE=1 SV=3 - [STAM1_HUMAN]	0.1241	1	4	5	9	3815000	4	5	4	5	0.0981	0.1241	12.5	182.11	540	59.1	4.82
P09211	Glutathione S-transferase P OS=Homo sapiens GN=GSTP1 PE=1 SV=2 - [GSTP1_HUMAN]	0.4429	1	6	6	10	3811000	5	5	5	5	0.3952	0.3476	12.87	133.18	210	23.3	5.64
P04114	Apolipoprotein B-100 OS=Homo sapiens GN=APOB PE=1 SV=2 - [APOB_HUMAN]	0.048	1	17	17	32	3795000	16	16	16	16	0.0462	0.0443	47.9	474.98	4563	515.3	7.05
Q9H444	Charged multivesicular body protein 4b OS=Homo sapiens GN=CHMP4B PE=1 SV=1 - [CHM4B_HUMAN]	0.0625	1	1	1	3	3782000	1	1	2	1	0.0625	0.0625	6.8	72.95	224	24.9	4.82
P06744	Glucose-6-phosphate isomerase OS=Homo sapiens GN=GPI PE=1 SV=4 - [G6PI_HUMAN]	0.0735	1	3	3	6	3735000	3	3	3	3	0.0735	0.0735	8.75	118.98	558	63.1	8.32
P61026	Ras-related protein Rab-10 OS=Homo sapiens GN=RAB10 PE=1 SV=1 - [RAB10_HUMAN]	0.115	4	1	2	5	3710000	2	2	3	2	0.115	0.115	6.94	83.12	200	22.5	8.38
P08758	Annexin A5 OS=Homo sapiens GN=ANXA5 PE=1 SV=2 - [ANXA5_HUMAN]	0.2219	1	6	7	15	3586000	6	7	7	8	0.2	0.2219	16.73	156.79	320	35.9	5.05
P30041	Peroxiredoxin-6 OS=Homo sapiens GN=PRDX6 PE=1 SV=3 - [PRDX6_HUMAN]	0.1875	1	3	3	5	3552000	2	3	2	3	0.0938	0.1875	5.99	111.56	224	25	6.38
Q15286	Ras-related protein Rab-35 OS=Homo sapiens GN=RAB35 PE=1 SV=1 - [RAB35_HUMAN]	0.1045	4	2	3	5	3536000	3	2	3	2	0.1045	0.0995	6.82	49.78	201	23	8.29
Q9P2B2	Prostaglandin F2 receptor negative regulator OS=Homo sapiens GN=PTGFRN PE=1 SV=2 - [FPRP_HUMAN]	0.0739	1	5	5	12	3499000	5	5	6	6	0.0739	0.0739	16.05	167.25	879	98.5	6.61
P61769	Beta-2-microglobulin OS=Homo sapiens GN=B2M PE=1 SV=1 - [B2MG_HUMAN]	0.1681	1	2	2	7	3420000	2	2	3	4	0.1681	0.1681	8.14	73.1	119	13.7	6.52
P11233	Ras-related protein Ral-A OS=Homo sapiens GN=RALA PE=1 SV=1 - [RALA_HUMAN]	0.1553	1	1	3	6	3159000	3	3	3	3	0.1553	0.1553	8.37	98.83	206	23.6	7.11
P68371	Tubulin beta-4B chain OS=Homo sapiens GN=TUBB4B PE=1 SV=1 - [TBB4B_HUMAN]	0.1551	5	1	6	12	3085000	5	6	6	6	0.1213	0.1551	17.04	205.55	445	49.8	4.89
O75340	Programmed cell death protein 6 OS=Homo sapiens GN=PDCD6 PE=1 SV=1 - [PDCD6_HUMAN]	0.2304	1	4	4	7	3033000	3	4	3	4	0.1675	0.2304	7.97	97.47	191	21.9	5.4
P01111	GTPase NRas OS=Homo sapiens GN=NRAS PE=1 SV=1 - [RASN_HUMAN]	0.1217	3	2	2	3	2975000	1	2	1	2	0.0582	0.1217	2.97	39.13	189	21.2	5.17
P52565	Rho GDP-dissociation inhibitor 1 OS=Homo sapiens GN=ARHGDIA PE=1 SV=3 - [GDIR1_HUMAN]	0.1863	1	3	3	8	2974000	3	2	5	3	0.1863	0.152	11.44	94.23	204	23.2	5.11
P60660	Myosin light polypeptide 6 OS=Homo sapiens GN=MYL6 PE=1 SV=2 - [MYL6_HUMAN]	0.1722	2	2	2	4	2936000	2	2	2	2	0.1722	0.1722	6.39	82.59	151	16.9	4.65
P09972	Fructose-bisphosphate aldolase C OS=Homo sapiens GN=ALDOC PE=1 SV=2 - [ALDOC_HUMAN]	0.1374	1	1	2	3	2914000	1	2	1	2	0.0632	0.1374	2.43	27.94	364	39.4	6.87
Q04941	Proteolipid protein 2 OS=Homo sapiens GN=PLP2 PE=1 SV=1 - [PLP2_HUMAN]	0.0855	1	1	1	1	2733000	1		1		0.0855		1.86		152	16.7	7.24
P35241	Radixin OS=Homo sapiens GN=RDX PE=1 SV=1 - [RADI_HUMAN]	0.1338	2	5	8	16	2710000	7	7	8	8	0.1201	0.1132	23.62	261.93	583	68.5	6.37
Q99497	Protein DJ-1 OS=Homo sapiens GN=PARK7 PE=1 SV=2 - [PARK7_HUMAN]	0.1534	1	2	2	6	2692000	2	2	3	3	0.1534	0.1534	7.9	85.38	189	19.9	6.79
P01834	Ig kappa chain C region OS=Homo sapiens GN=IGKC PE=1 SV=1 - [IGKC_HUMAN]	0.3585	1	2	2	8	2671000	2	2	4	4	0.3585	0.3585	11.34	71.44	106	11.6	5.87
P58546	Myotrophin OS=Homo sapiens GN=MTPN PE=1 SV=2 - [MTPN_HUMAN]	0.1441	1	1	1	2	2612000	1	1	1	1	0.1441	0.1441	4.13	43.3	118	12.9	5.52
O95297	Myelin protein zero-like protein 1 OS=Homo sapiens GN=MPZL1 PE=1 SV=1 - [MPZL1_HUMAN]	0.1413	1	3	3	5	2562000	3	2	3	2	0.1413	0.0929	8.23	68.45	269	29.1	8.72
P50502	Hsc70-interacting protein OS=Homo sapiens GN=ST13 PE=1 SV=2 - [F10A1_HUMAN]	0.0596	3	2	2	4	2533000	2	2	2	2	0.0596	0.0596	6.19	85.01	369	41.3	5.27
P01877	Ig alpha-2 chain C region OS=Homo sapiens GN=IGHA2 PE=1 SV=3 - [IGHA2_HUMAN]	0.05	2	1	1	2	2525000	1	1	1	1	0.05	0.05	3.52	45.09	340	36.5	6.1
O00161	Synaptosomal-associated protein 23 OS=Homo sapiens GN=SNAP23 PE=1 SV=1 - [SNP23_HUMAN]	0.2559	1	4	4	8	2503000	4	4	4	4	0.2559	0.2559	12.38	113.82	211	23.3	5.01
O14745	Na(+)/H(+) exchange regulatory cofactor NHE-RF1 OS=Homo sapiens GN=SLC9A3R1 PE=1 SV=4 - [NHRF1_HUMAN]	0.1201	1	3	3	6	2498000	3	3	3	3	0.1201	0.1201	8.9	98.98	358	38.8	5.77
O75531	Barrier-to-autointegration factor OS=Homo sapiens GN=BANF1 PE=1 SV=1 - [BAF_HUMAN]	0.2697	1	1	1	4	2474000	1	1	2	2	0.2697	0.2697	5.17	38.83	89	10.1	6.09
P05023	Sodium/potassium-transporting ATPase subunit alpha-1 OS=Homo sapiens GN=ATP1A1 PE=1 SV=1 - [AT1A1_HUMAN]	0.1007	5	7	7	18	2403000	7	7	9	9	0.1007	0.1007	28.38	320.68	1023	112.8	5.49
P62942	Peptidyl-prolyl cis-trans isomerase FKBP1A OS=Homo sapiens GN=FKBP1A PE=1 SV=2 - [FKB1A_HUMAN]	0.1204	1	1	1	1	2395000		1		1		0.1204		27.54	108	11.9	8.16
P08670	Vimentin OS=Homo sapiens GN=VIM PE=1 SV=4 - [VIME_HUMAN]	0.0858	1	4	4	7	2336000	3	4	3	4	0.0665	0.0858	7.21	101.12	466	53.6	5.12
P40925	Malate dehydrogenase, cytoplasmic OS=Homo sapiens GN=MDH1 PE=1 SV=4 - [MDHC_HUMAN]	0.1257	1	3	3	6	2298000	3	3	3	3	0.1257	0.1257	11.18	138.49	334	36.4	7.36
Q02818	Nucleobindin-1 OS=Homo sapiens GN=NUCB1 PE=1 SV=4 - [NUCB1_HUMAN]	0.0217	1	1	1	1	2281000		1		1	0	0.0217		25.96	461	53.8	5.25
Q9Y3L5	Ras-related protein Rap-2c OS=Homo sapiens GN=RAP2C PE=1 SV=1 - [RAP2C_HUMAN]	0.1366	2	2	2	4	2220000	2	2	2	2	0.1366	0.1366	5.66	62.19	183	20.7	4.94
P14543	Nidogen-1 OS=Homo sapiens GN=NID1 PE=1 SV=3 - [NID1_HUMAN]	0.0369	1	4	4	8	2169000	4	4	4	4	0.0369	0.0369	7.13	87.43	1247	136.3	5.29
P63000	Ras-related C3 botulinum toxin substrate 1 OS=Homo sapiens GN=RAC1 PE=1 SV=1 - [RAC1_HUMAN]	0.1302	5	1	2	4	2129000	2	2	2	2	0.1302	0.1302	6.18	44.81	192	21.4	8.5
Q9NRY6	Phospholipid scramblase 3 OS=Homo sapiens GN=PLSCR3 PE=1 SV=2 - [PLS3_HUMAN]	0.0644	1	1	1	2	2086000	1	1	1	1	0.0644	0.0644	4.49	63.89	295	31.6	6.65
O60716	Catenin delta-1 OS=Homo sapiens GN=CTNND1 PE=1 SV=1 - [CTND1_HUMAN]	0.0103	1	1	1	2	2025000	1	1	1	1	0.0103	0.0103	3	47.9	968	108.1	6.23
P18065	Insulin-like growth factor-binding protein 2 OS=Homo sapiens GN=IGFBP2 PE=1 SV=2 - [IBP2_HUMAN]	0.0677	1	2	2	4	1990000	2	2	2	2	0.0677	0.0677	6.69	69.76	325	34.8	7.5
P08133	Annexin A6 OS=Homo sapiens GN=ANXA6 PE=1 SV=3 - [ANXA6_HUMAN]	0.1204	1	6	6	10	1968000	4	6	4	6	0.0906	0.1204	12.78	149.25	673	75.8	5.6
P55058	Phospholipid transfer protein OS=Homo sapiens GN=PLTP PE=1 SV=1 - [PLTP_HUMAN]	0.0243	1	1	1	2	1937000	1	1	1	1	0.0243	0.0243	4.22	65.7	493	54.7	7.01
P84095	Rho-related GTP-binding protein RhoG OS=Homo sapiens GN=RHOG PE=1 SV=1 - [RHOG_HUMAN]	0.1466	5	1	2	4	1931000	2	2	2	2	0.1466	0.1466	6.1	39.99	191	21.3	8.12
Q08431	Lactadherin OS=Homo sapiens GN=MFGE8 PE=1 SV=2 - [MFGM_HUMAN]	0.0491	1	2	2	4	1835000	2	2	2	2	0.0491	0.0491	5.09	77.56	387	43.1	8.15
P08648	Integrin alpha-5 OS=Homo sapiens GN=ITGA5 PE=1 SV=2 - [ITA5_HUMAN]	0.0562	1	4	4	9	1756000	3	4	4	5	0.0486	0.0562	14.27	145.45	1049	114.5	5.77
Q8WUM4	Programmed cell death 6-interacting protein OS=Homo sapiens GN=PDCD6IP PE=1 SV=1 - [PDC6I_HUMAN]	0.0657	1	5	5	9	1732000	4	5	4	5	0.0565	0.0657	13.87	196.07	868	96	6.52
P18206	Vinculin OS=Homo sapiens GN=VCL PE=1 SV=4 - [VINC_HUMAN]	0.0547	1	5	5	10	1671000	4	5	5	5	0.045	0.0547	13.97	175.55	1134	123.7	5.66
Q8N2S1	Latent-transforming growth factor beta-binding protein 4 OS=Homo sapiens GN=LTBP4 PE=1 SV=2 - [LTBP4_HUMAN]	0.0708	1	8	8	14	1666000	8	6	8	6	0.0708	0.056	22.74	215.72	1624	173.3	5.43
P13473	Lysosome-associated membrane glycoprotein 2 OS=Homo sapiens GN=LAMP2 PE=1 SV=2 - [LAMP2_HUMAN]	0.0195	1	1	1	2	1618000	1	1	1	1	0.0195	0.0195	2.41	42.84	410	44.9	5.63
P18827	Syndecan-1 OS=Homo sapiens GN=SDC1 PE=1 SV=3 - [SDC1_HUMAN]	0.0613	1	1	1	4	1584000	1	1	2	2	0.0613	0.0613	8.67	123.67	310	32.4	4.63
P60953	Cell division control protein 42 homolog OS=Homo sapiens GN=CDC42 PE=1 SV=2 - [CDC42_HUMAN]	0.2042	5	2	3	8	1579000	3	3	4	4	0.2042	0.2042	10.17	42.54	191	21.2	6.55
P24534	Elongation factor 1-beta OS=Homo sapiens GN=EEF1B2 PE=1 SV=3 - [EF1B_HUMAN]	0.0667	1	1	1	2	1527000	1	1	1	1	0.0667	0.0667	4.29	60.51	225	24.7	4.67
Q969P0	Immunoglobulin superfamily member 8 OS=Homo sapiens GN=IGSF8 PE=1 SV=1 - [IGSF8_HUMAN]	0.0538	1	3	3	6	1524000	3	3	3	3	0.0538	0.0538	7.43	98.75	613	65	8
P09382	Galectin-1 OS=Homo sapiens GN=LGALS1 PE=1 SV=2 - [LEG1_HUMAN]	0.237	1	3	3	4	1522000	2	2	2	2	0.1778	0.1185	1.97	36.49	135	14.7	5.5
P55209	Nucleosome assembly protein 1-like 1 OS=Homo sapiens GN=NAP1L1 PE=1 SV=1 - [NP1L1_HUMAN]	0.0435	1	1	1	2	1470000	1	1	1	1	0.0435	0.0435	2.83	25.88	391	45.3	4.46
O14791	Apolipoprotein L1 OS=Homo sapiens GN=APOL1 PE=1 SV=5 - [APOL1_HUMAN]	0.0377	1	1	1	2	1469000	1	1	1	1	0.0377	0.0377	3.48	55.46	398	43.9	5.81
P53985	Monocarboxylate transporter 1 OS=Homo sapiens GN=SLC16A1 PE=1 SV=3 - [MOT1_HUMAN]	0.058	1	2	2	6	1459000	2	2	3	3	0.058	0.058	8.56	72.36	500	53.9	8.66
Q7L9L4	MOB kinase activator 1B OS=Homo sapiens GN=MOB1B PE=1 SV=3 - [MOB1B_HUMAN]	0.0509	2	1	1	2	1458000	1	1	1	1	0.0509	0.0509	2.53	41.69	216	25.1	6.73
P51149	Ras-related protein Rab-7a OS=Homo sapiens GN=RAB7A PE=1 SV=1 - [RAB7A_HUMAN]	0.1787	1	3	3	8	1453000	3	3	4	4	0.1787	0.1787	12.93	160.18	207	23.5	6.7
P35221	Catenin alpha-1 OS=Homo sapiens GN=CTNNA1 PE=1 SV=1 - [CTNA1_HUMAN]	0.0629	2	4	4	10	1434000	4	4	5	5	0.0629	0.0629	17.55	178.47	906	100	6.29
Q9H4G4	Golgi-associated plant pathogenesis-related protein 1 OS=Homo sapiens GN=GLIPR2 PE=1 SV=3 - [GAPR1_HUMAN]	0.0844	1	1	1	2	1418000	1	1	1	1	0.0844	0.0844	2.75	56.57	154	17.2	9.41
P00558	Phosphoglycerate kinase 1 OS=Homo sapiens GN=PGK1 PE=1 SV=3 - [PGK1_HUMAN]	0.1103	1	3	3	5	1413000	3	2	3	2	0.1103	0.0839	9.85	76.98	417	44.6	8.1
P02751	Fibronectin OS=Homo sapiens GN=FN1 PE=1 SV=4 - [FINC_HUMAN]	0.0256	1	4	4	8	1373000	4	4	4	4	0.0256	0.0256	12.64	114.03	2386	262.5	5.71
P14209	CD99 antigen OS=Homo sapiens GN=CD99 PE=1 SV=1 - [CD99_HUMAN]	0.0757	1	1	1	2	1349000	1	1	1	1	0.0757	0.0757	3.67	100.37	185	18.8	4.75
P63208	S-phase kinase-associated protein 1 OS=Homo sapiens GN=SKP1 PE=1 SV=2 - [SKP1_HUMAN]	0.1534	1	2	2	4	1340000	2	2	2	2	0.1534	0.1534	6.55	66.3	163	18.6	4.54
P20908	Collagen alpha-1(V) chain OS=Homo sapiens GN=COL5A1 PE=1 SV=3 - [CO5A1_HUMAN]	0.0174	1	2	2	6	1340000	2	2	3	3	0.0174	0.0174	9.55	77.15	1838	183.4	5.06
Q12846	Syntaxin-4 OS=Homo sapiens GN=STX4 PE=1 SV=2 - [STX4_HUMAN]	0.0303	1	1	1	2	1337000	1	1	1	1	0.0303	0.0303	2.03	29.34	297	34.2	6.28
O15230	Laminin subunit alpha-5 OS=Homo sapiens GN=LAMA5 PE=1 SV=8 - [LAMA5_HUMAN]	0.0406	1	10	10	20	1322000	10	8	11	9	0.0406	0.0317	30.26	268.74	3695	399.5	7.02
P09525	Annexin A4 OS=Homo sapiens GN=ANXA4 PE=1 SV=4 - [ANXA4_HUMAN]	0.1567	1	3	4	7	1311000	3	4	3	4	0.1348	0.1567	9.14	112.39	319	35.9	6.13
Q13308	Inactive tyrosine-protein kinase 7 OS=Homo sapiens GN=PTK7 PE=1 SV=2 - [PTK7_HUMAN]	0.0243	1	2	2	4	1306000	2	2	2	2	0.0243	0.0243	6.1	74.78	1070	118.3	7.09
O14964	Hepatocyte growth factor-regulated tyrosine kinase substrate OS=Homo sapiens GN=HGS PE=1 SV=1 - [HGS_HUMAN]	0.045	1	3	3	8	1282000	3	3	4	4	0.045	0.045	9.78	66.54	777	86.1	6.16
Q12841	Follistatin-related protein 1 OS=Homo sapiens GN=FSTL1 PE=1 SV=1 - [FSTL1_HUMAN]	0.1623	1	4	4	10	1248000	4	4	5	5	0.1623	0.1623	13.41	143.3	308	35	5.52
P23142	Fibulin-1 OS=Homo sapiens GN=FBLN1 PE=1 SV=4 - [FBLN1_HUMAN]	0.0782	1	4	4	8	1237000	4	4	4	4	0.0782	0.0782	9.37	131.94	703	77.2	5.22
P31689	DnaJ homolog subfamily A member 1 OS=Homo sapiens GN=DNAJA1 PE=1 SV=2 - [DNJA1_HUMAN]	0.1033	1	3	3	6	1121000	3	3	3	3	0.1033	0.1033	9.15	103.49	397	44.8	7.08
Q9P273	Teneurin-3 OS=Homo sapiens GN=TENM3 PE=2 SV=3 - [TEN3_HUMAN]	0.0044	1	1	1	2	1102000	1	1	1	1	0.0044	0.0044	3.72	46.24	2699	300.8	6.42
Q9ULC3	Ras-related protein Rab-23 OS=Homo sapiens GN=RAB23 PE=1 SV=1 - [RAB23_HUMAN]	0.0675	1	1	1	2	1027000	1	1	1	1	0.0675	0.0675	4.26	44.22	237	26.6	6.6
Q16543	Hsp90 co-chaperone Cdc37 OS=Homo sapiens GN=CDC37 PE=1 SV=1 - [CDC37_HUMAN]	0.045	1	1	1	2	1014000	1	1	1	1	0.045	0.045	3	23.79	378	44.4	5.25
Q16563	Synaptophysin-like protein 1 OS=Homo sapiens GN=SYPL1 PE=1 SV=1 - [SYPL1_HUMAN]	0.0425	1	1	1	2	1006000	1	1	1	1	0.0425	0.0425	1.81	24.85	259	28.5	8.43
P31948	Stress-induced-phosphoprotein 1 OS=Homo sapiens GN=STIP1 PE=1 SV=1 - [STIP1_HUMAN]	0.035	1	2	2	4	989500	2	2	2	2	0.035	0.035	5.21	67.22	543	62.6	6.8
O75695	Protein XRP2 OS=Homo sapiens GN=RP2 PE=1 SV=4 - [XRP2_HUMAN]	0.0629	1	2	2	3	985200	1	2	1	2	0.0286	0.0629	3.01	41.43	350	39.6	5.12
P04004	Vitronectin OS=Homo sapiens GN=VTN PE=1 SV=1 - [VTNC_HUMAN]	0.0314	1	1	1	2	982300	1	1	1	1	0.0314	0.0314	3.9	25.74	478	54.3	5.8
P29692	Elongation factor 1-delta OS=Homo sapiens GN=EEF1D PE=1 SV=5 - [EF1D_HUMAN]	0.0854	1	2	2	4	979500	2	2	2	2	0.0854	0.0854	6.89	99.54	281	31.1	5.01
P10909	Clusterin OS=Homo sapiens GN=CLU PE=1 SV=1 - [CLUS_HUMAN]	0.0646	1	2	2	4	937000	2	2	2	2	0.0646	0.0646	6.8	63.45	449	52.5	6.27
P54709	Sodium/potassium-transporting ATPase subunit beta-3 OS=Homo sapiens GN=ATP1B3 PE=1 SV=1 - [AT1B3_HUMAN]	0.0502	1	1	1	2	924300	1	1	1	1	0.0502	0.0502	3.61	38.16	279	31.5	8.35
P02656	Apolipoprotein C-III OS=Homo sapiens GN=APOC3 PE=1 SV=1 - [APOC3_HUMAN]	0.1616	1	1	1	2	902700	1	1	1	1	0.1616	0.1616	3.48	50.1	99	10.8	5.41
P02647	Apolipoprotein A-I OS=Homo sapiens GN=APOA1 PE=1 SV=1 - [APOA1_HUMAN]	0.1948	1	4	4	8	868900	4	4	4	4	0.1948	0.1948	12.07	160.73	267	30.8	5.76
P07996	Thrombospondin-1 OS=Homo sapiens GN=THBS1 PE=1 SV=2 - [TSP1_HUMAN]	0.0103	1	1	1	2	863200	1	1	1	1	0.0103	0.0103	2.86	27.25	1170	129.3	4.94
P38646	Stress-70 protein, mitochondrial OS=Homo sapiens GN=HSPA9 PE=1 SV=2 - [GRP75_HUMAN]	0.0133	1	1	1	2	848900	1	1	1	1	0.0133	0.0133	2.77	58.04	679	73.6	6.16
Q9H9H4	Vacuolar protein sorting-associated protein 37B OS=Homo sapiens GN=VPS37B PE=1 SV=1 - [VP37B_HUMAN]	0.0596	1	1	1	4	847600	1	1	2	2	0.0596	0.0596	6.28	36.85	285	31.3	7.34
Q9Y696	Chloride intracellular channel protein 4 OS=Homo sapiens GN=CLIC4 PE=1 SV=4 - [CLIC4_HUMAN]	0.166	1	3	3	8	843700	3	3	4	4	0.166	0.166	11.93	84.47	253	28.8	5.59
Q96FZ7	Charged multivesicular body protein 6 OS=Homo sapiens GN=CHMP6 PE=1 SV=3 - [CHMP6_HUMAN]	0.0647	1	1	1	2	793300	1	1	1	1	0.0647	0.0647	2.72	52.77	201	23.5	5.31
P37802	Transgelin-2 OS=Homo sapiens GN=TAGLN2 PE=1 SV=3 - [TAGL2_HUMAN]	0.0704	1	1	1	1	779600	1		1		0.0704	0	2.25		199	22.4	8.25
A6NDB9	Paralemmin-3 OS=Homo sapiens GN=PALM3 PE=1 SV=2 - [PALM3_HUMAN]	0.0446	1	2	2	4	760800	2	2	2	2	0.0446	0.0446	5.96	66.61	673	71.7	4.53
P50995	Annexin A11 OS=Homo sapiens GN=ANXA11 PE=1 SV=1 - [ANX11_HUMAN]	0.0218	1	1	1	1	730700	1		1		0.0218		2.46		505	54.4	7.65
P09651	Heterogeneous nuclear ribonucleoprotein A1 OS=Homo sapiens GN=HNRNPA1 PE=1 SV=5 - [ROA1_HUMAN]	0.0995	2	2	3	6	721900	3	3	3	3	0.0995	0.0995	8.54	106.5	372	38.7	9.13
O75781	Paralemmin-1 OS=Homo sapiens GN=PALM PE=1 SV=2 - [PALM_HUMAN]	0.0491	1	1	1	2	696600	1	1	1	1	0.0491	0.0491	2.91	35.72	387	42.1	5
P61088	Ubiquitin-conjugating enzyme E2 N OS=Homo sapiens GN=UBE2N PE=1 SV=1 - [UBE2N_HUMAN]	0.0724	2	1	1	2	664900	1	1	1	1	0.0724	0.0724	3.98	45.07	152	17.1	6.57
P05386	60S acidic ribosomal protein P1 OS=Homo sapiens GN=RPLP1 PE=1 SV=1 - [RLA1_HUMAN]	0.1404	1	1	1	2	639700	1		2		0.1404		5.07		114	11.5	4.32
P22626	Heterogeneous nuclear ribonucleoproteins A2/B1 OS=Homo sapiens GN=HNRNPA2B1 PE=1 SV=2 - [ROA2_HUMAN]	0.0538	1	1	2	4	631900	2	2	2	2	0.0538	0.0538	5.42	58.92	353	37.4	8.95
Q15599	Na(+)/H(+) exchange regulatory cofactor NHE-RF2 OS=Homo sapiens GN=SLC9A3R2 PE=1 SV=2 - [NHRF2_HUMAN]	0.0267	1	1	1	2	584900	1	1	1	1	0.0267	0.0267	2.44	49.1	337	37.4	7.93
P10301	Ras-related protein R-Ras OS=Homo sapiens GN=RRAS PE=1 SV=1 - [RRAS_HUMAN]	0.1284	2	2	2	6	533000	2	2	3	3	0.1284	0.1284	11.3	118.15	218	23.5	6.93
O75347	Tubulin-specific chaperone A OS=Homo sapiens GN=TBCA PE=1 SV=3 - [TBCA_HUMAN]	0.0833	1	1	1	1	472700	1		1		0.0833		2.04		108	12.8	5.29
Q99961	Endophilin-A2 OS=Homo sapiens GN=SH3GL1 PE=1 SV=1 - [SH3G1_HUMAN]	0.0543	1	1	1	2	471300	1	1	1	1	0.0543	0.0543	1.9	51.17	368	41.5	5.43
P63218	Guanine nucleotide-binding protein G(I)/G(S)/G(O) subunit gamma-5 OS=Homo sapiens GN=GNG5 PE=1 SV=3 - [GBG5_HUMAN]	0.1324	1	1	1	2	442500	1	1	1	1	0.1324	0.1324	2.64	49.75	68	7.3	9.85
P20073	Annexin A7 OS=Homo sapiens GN=ANXA7 PE=1 SV=3 - [ANXA7_HUMAN]	0.0861	1	3	3	6	432500	3	3	3	3	0.0861	0.0861	8.18	43.49	488	52.7	5.68
Q9H4M9	EH domain-containing protein 1 OS=Homo sapiens GN=EHD1 PE=1 SV=2 - [EHD1_HUMAN]	0.0225	1	1	1	2	407400	1	1	1	1	0.0225	0.0225	2.6	22.35	534	60.6	6.83
Q15365	Poly(rC)-binding protein 1 OS=Homo sapiens GN=PCBP1 PE=1 SV=2 - [PCBP1_HUMAN]	0.0309	3	1	1	1	394300	1		1		0.0309		2.72		356	37.5	7.09
Q53EZ4	Centrosomal protein of 55 kDa OS=Homo sapiens GN=CEP55 PE=1 SV=3 - [CEP55_HUMAN]	0.0259	1	1	1	1	390300		1		1	0	0.0259		35.09	464	54.1	7.01
A5D8V6	Vacuolar protein sorting-associated protein 37C OS=Homo sapiens GN=VPS37C PE=1 SV=2 - [VP37C_HUMAN]	0.031	1	1	1	2	367000	1	1	1	1	0.031	0.031	3.05	57.6	355	38.6	5.21
Q9BX67	Junctional adhesion molecule C OS=Homo sapiens GN=JAM3 PE=1 SV=1 - [JAM3_HUMAN]	0.0258	1	1	1	2	351800	1	1	1	1	0.0258	0.0258	2.41	26.51	310	35	7.59
Q14108	Lysosome membrane protein 2 OS=Homo sapiens GN=SCARB2 PE=1 SV=2 - [SCRB2_HUMAN]	0.0272	1	1	1	1	316400	1		1		0.0272		2.42		478	54.3	5.14
P53990	IST1 homolog OS=Homo sapiens GN=IST1 PE=1 SV=1 - [IST1_HUMAN]	0.0275	1	1	1	2	315000	1	1	1	1	0.0275	0.0275	2.68	33.97	364	39.7	5.35
Q9C0H2	Protein tweety homolog 3 OS=Homo sapiens GN=TTYH3 PE=1 SV=3 - [TTYH3_HUMAN]	0.0306	1	2	2	4	236900	2	2	2	2	0.0306	0.0306	4.98	38.26	523	57.5	5.39
P60981	Destrin OS=Homo sapiens GN=DSTN PE=1 SV=3 - [DEST_HUMAN]	0.0788	1	1	1	2	206600	1	1	1	1	0.0788	0.0788	3.12	34.28	165	18.5	7.85
P14550	Alcohol dehydrogenase [NADP(+)] OS=Homo sapiens GN=AKR1A1 PE=1 SV=3 - [AK1A1_HUMAN]	0.0585	1	1	1	2	196900	1	1	1	1	0.0585	0.0585	1.75	20.39	325	36.5	6.79
P05067	Amyloid beta A4 protein OS=Homo sapiens GN=APP PE=1 SV=3 - [A4_HUMAN]	0.0312	1	2	2	6	85210	2	2	3	3	0.0312	0.0312	4.47	64.61	770	86.9	4.82
P27105	Erythrocyte band 7 integral membrane protein OS=Homo sapiens GN=STOM PE=1 SV=3 - [STOM_HUMAN]	0.0833	1	2	2	4	0	2	2	2	2	0.0833	0.0833	6.29	70.73	288	31.7	7.88

## Sheet: YaFuSS
Supplementary Table 1-3. List of proteins included in the EVs secreted from YaFuSS cell line
Accession	Description	Sum (Coverage)	Sum (# Proteins)	Sum (# Unique Peptides)	Sum (# Peptides)	Sum (# PSMs)	Area	# Peptides A10	# Peptides A6	# PSM A10	# PSM A6	Coverage A10	Coverage A6	Score A10	Score A6	# AAs	MW [kDa]	calc. pI
P07477	Trypsin-1 OS=Homo sapiens GN=PRSS1 PE=1 SV=1 - [TRY1_HUMAN]	0.0405	1	1	1	103	2048000000	1	1	51	52	0.0405	0.0405	123.21	930.98	247	26.5	6.51
P80723	Brain acid soluble protein 1 OS=Homo sapiens GN=BASP1 PE=1 SV=2 - [BASP1_HUMAN]	0.7313	1	14	14	46	151400000	14	13	23	23	0.7313	0.696	62.84	476.79	227	22.7	4.63
Q96KK5	Histone H2A type 1-H OS=Homo sapiens GN=HIST1H2AH PE=1 SV=3 - [H2A1H_HUMAN]	0.2734	15	3	3	10	104600000	3	3	5	5	0.2734	0.2734	15.95	141.73	128	13.9	10.89
P62805	Histone H4 OS=Homo sapiens GN=HIST1H4A PE=1 SV=2 - [H4_HUMAN]	0.5146	1	6	6	16	102600000	6	6	8	8	0.5146	0.5146	24.8	270.77	103	11.4	11.36
P60709	Actin, cytoplasmic 1 OS=Homo sapiens GN=ACTB PE=1 SV=1 - [ACTB_HUMAN]	0.3787	8	6	11	36	74910000	10	11	17	19	0.3573	0.3787	44.13	478.43	375	41.7	5.48
P12109	Collagen alpha-1(VI) chain OS=Homo sapiens GN=COL6A1 PE=1 SV=3 - [CO6A1_HUMAN]	0.3113	1	21	21	55	59710000	21	20	28	27	0.3113	0.2792	83.55	708.86	1028	108.5	5.43
Q6NXT2	Histone H3.3C OS=Homo sapiens GN=H3F3C PE=1 SV=3 - [H3C_HUMAN]	0.1185	5	2	2	3	58310000	1	2	1	2	0.0667	0.1185	2.77	55.43	135	15.2	11.11
P02768	Serum albumin OS=Homo sapiens GN=ALB PE=1 SV=2 - [ALBU_HUMAN]	0.1067	1	7	7	16	45280000	7	7	8	8	0.1067	0.1067	24.79	274.49	609	69.3	6.28
P16401	Histone H1.5 OS=Homo sapiens GN=HIST1H1B PE=1 SV=3 - [H15_HUMAN]	0.2124	1	4	4	9	42470000	3	4	4	5	0.1416	0.2124	10.78	195.9	226	22.6	10.92
P04264	Keratin, type II cytoskeletal 1 OS=Homo sapiens GN=KRT1 PE=1 SV=6 - [K2C1_HUMAN]	0.4332	1	17	22	54	38590000	21	22	26	28	0.4208	0.4332	80.71	989.96	644	66	8.12
P11142	Heat shock cognate 71 kDa protein OS=Homo sapiens GN=HSPA8 PE=1 SV=1 - [HSP7C_HUMAN]	0.4009	3	18	19	53	36940000	19	19	27	26	0.4009	0.4009	78.2	817.67	646	70.9	5.52
P0CG48	Polyubiquitin-C OS=Homo sapiens GN=UBC PE=1 SV=3 - [UBC_HUMAN]	0.4467	4	3	3	6	36210000	3	3	3	3	0.4467	0.4467	8.89	108.65	685	77	7.66
P60033	CD81 antigen OS=Homo sapiens GN=CD81 PE=1 SV=1 - [CD81_HUMAN]	0.2839	1	4	4	10	33580000	4	4	5	5	0.2839	0.2839	15.36	172.37	236	25.8	5.29
P61224	Ras-related protein Rap-1b OS=Homo sapiens GN=RAP1B PE=1 SV=1 - [RAP1B_HUMAN]	0.4511	3	3	8	20	33300000	8	8	10	10	0.4511	0.4511	29.43	284.02	184	20.8	5.78
P62937	Peptidyl-prolyl cis-trans isomerase A OS=Homo sapiens GN=PPIA PE=1 SV=2 - [PPIA_HUMAN]	0.4121	4	7	7	15	27680000	5	7	6	9	0.2606	0.4121	14.06	237.59	165	18	7.81
P35527	Keratin, type I cytoskeletal 9 OS=Homo sapiens GN=KRT9 PE=1 SV=3 - [K1C9_HUMAN]	0.4414	2	18	19	42	25560000	16	19	19	23	0.4029	0.4414	57.4	870.27	623	62	5.24
P63104	14-3-3 protein zeta/delta OS=Homo sapiens GN=YWHAZ PE=1 SV=1 - [1433Z_HUMAN]	0.4531	1	7	9	31	24980000	8	9	15	16	0.4204	0.4531	41.07	454.6	245	27.7	4.79
P11047	Laminin subunit gamma-1 OS=Homo sapiens GN=LAMC1 PE=1 SV=3 - [LAMC1_HUMAN]	0.312	1	35	35	90	24610000	35	34	46	44	0.312	0.3076	149.13	1749.65	1609	177.5	5.12
P04406	Glyceraldehyde-3-phosphate dehydrogenase OS=Homo sapiens GN=GAPDH PE=1 SV=3 - [G3P_HUMAN]	0.2955	1	6	6	13	24020000	6	6	7	6	0.2955	0.2955	20.93	292.93	335	36	8.46
Q15113	Procollagen C-endopeptidase enhancer 1 OS=Homo sapiens GN=PCOLCE PE=1 SV=2 - [PCOC1_HUMAN]	0.3163	1	10	10	20	23390000	9	10	10	10	0.2918	0.3163	32.03	365.98	449	47.9	7.43
P08253	72 kDa type IV collagenase OS=Homo sapiens GN=MMP2 PE=1 SV=2 - [MMP2_HUMAN]	0.3409	1	17	17	48	22500000	17	17	24	24	0.3409	0.3409	66.78	533.97	660	73.8	5.47
P35613	Basigin OS=Homo sapiens GN=BSG PE=1 SV=2 - [BASI_HUMAN]	0.1844	1	6	6	26	19420000	6	6	13	13	0.1844	0.1844	43.75	436.05	385	42.2	5.66
P07942	Laminin subunit beta-1 OS=Homo sapiens GN=LAMB1 PE=1 SV=2 - [LAMB1_HUMAN]	0.2072	1	27	27	57	18120000	23	26	27	30	0.1865	0.1965	80.14	819.63	1786	197.9	4.94
P29966	Myristoylated alanine-rich C-kinase substrate OS=Homo sapiens GN=MARCKS PE=1 SV=4 - [MARCS_HUMAN]	0.4006	1	6	6	18	17890000	6	6	9	9	0.4006	0.4006	31.57	318.32	332	31.5	4.45
Q96HU8	GTP-binding protein Di-Ras2 OS=Homo sapiens GN=DIRAS2 PE=1 SV=1 - [DIRA2_HUMAN]	0.0553	1	1	1	2	17800000	1	1	1	1	0.0553	0.0553	3.25	39.85	199	22.5	8.76
Q9UBI6	Guanine nucleotide-binding protein G(I)/G(S)/G(O) subunit gamma-12 OS=Homo sapiens GN=GNG12 PE=1 SV=3 - [GBG12_HUMAN]	0.5694	1	3	3	10	17460000	3	3	5	5	0.5694	0.5694	14.93	121.6	72	8	8.97
P21741	Midkine OS=Homo sapiens GN=MDK PE=1 SV=1 - [MK_HUMAN]	0.3077	1	3	3	6	17460000	3	3	3	3	0.3077	0.3077	10.28	120.77	143	15.6	9.79
P08107	Heat shock 70 kDa protein 1A/1B OS=Homo sapiens GN=HSPA1A PE=1 SV=5 - [HSP71_HUMAN]	0.3027	2	13	14	47	16720000	14	14	23	24	0.3027	0.3027	69.73	541.31	641	70	5.66
O00560	Syntenin-1 OS=Homo sapiens GN=SDCBP PE=1 SV=1 - [SDCB1_HUMAN]	0.1678	1	3	3	7	15780000	3	3	3	4	0.1678	0.1678	8.01	87.33	298	32.4	7.53
O75531	Barrier-to-autointegration factor OS=Homo sapiens GN=BANF1 PE=1 SV=1 - [BAF_HUMAN]	0.2697	1	1	1	4	13950000	1	1	2	2	0.2697	0.2697	5.46	54.44	89	10.1	6.09
P08238	Heat shock protein HSP 90-beta OS=Homo sapiens GN=HSP90AB1 PE=1 SV=4 - [HS90B_HUMAN]	0.2486	8	7	15	37	13630000	15	14	19	18	0.2486	0.239	58.13	635.02	724	83.2	5.03
P23528	Cofilin-1 OS=Homo sapiens GN=CFL1 PE=1 SV=3 - [COF1_HUMAN]	0.2711	2	3	3	7	13580000	3	3	3	4	0.2711	0.2711	11.5	161.91	166	18.5	8.09
P35908	Keratin, type II cytoskeletal 2 epidermal OS=Homo sapiens GN=KRT2 PE=1 SV=2 - [K22E_HUMAN]	0.0955	7	1	6	14	13220000	5	6	6	8	0.0845	0.0955	16.49	232.91	639	65.4	8
P62158	Calmodulin OS=Homo sapiens GN=CALM1 PE=1 SV=2 - [CALM_HUMAN]	0.443	1	6	6	26	12430000	6	6	13	13	0.443	0.443	28.77	227.84	149	16.8	4.22
P02649	Apolipoprotein E OS=Homo sapiens GN=APOE PE=1 SV=1 - [APOE_HUMAN]	0.3502	1	10	10	24	11970000	10	10	12	12	0.3502	0.3502	38.02	538.42	317	36.1	5.73
P31946	14-3-3 protein beta/alpha OS=Homo sapiens GN=YWHAB PE=1 SV=3 - [1433B_HUMAN]	0.4024	2	4	8	27	11520000	8	8	14	13	0.4024	0.4024	39.26	379.44	246	28.1	4.83
P08962	CD63 antigen OS=Homo sapiens GN=CD63 PE=1 SV=2 - [CD63_HUMAN]	0.042	1	1	1	2	11240000	1	1	1	1	0.042	0.042	3.03	58.24	238	25.6	7.81
P04075	Fructose-bisphosphate aldolase A OS=Homo sapiens GN=ALDOA PE=1 SV=2 - [ALDOA_HUMAN]	0.3269	1	10	10	21	11240000	8	9	10	11	0.2967	0.3242	29.01	373.03	364	39.4	8.09
P62258	14-3-3 protein epsilon OS=Homo sapiens GN=YWHAE PE=1 SV=1 - [1433E_HUMAN]	0.3922	1	7	8	29	10930000	8	8	15	14	0.3922	0.3922	36.86	339.9	255	29.2	4.74
Q06830	Peroxiredoxin-1 OS=Homo sapiens GN=PRDX1 PE=1 SV=1 - [PRDX1_HUMAN]	0.4724	2	7	8	17	10910000	8	8	8	9	0.4724	0.4724	15.5	215.02	199	22.1	8.13
P15531	Nucleoside diphosphate kinase A OS=Homo sapiens GN=NME1 PE=1 SV=1 - [NDKA_HUMAN]	0.4079	3	5	5	18	10890000	5	5	9	9	0.4079	0.4079	27.81	286.13	152	17.1	6.19
P61981	14-3-3 protein gamma OS=Homo sapiens GN=YWHAG PE=1 SV=2 - [1433G_HUMAN]	0.3077	2	4	7	27	10690000	7	7	13	14	0.3077	0.3077	28.58	292.82	247	28.3	4.89
P07900	Heat shock protein HSP 90-alpha OS=Homo sapiens GN=HSP90AA1 PE=1 SV=5 - [HS90A_HUMAN]	0.1954	7	4	12	29	10620000	12	12	15	14	0.1954	0.1954	45.89	515.23	732	84.6	5.02
P13987	CD59 glycoprotein OS=Homo sapiens GN=CD59 PE=1 SV=1 - [CD59_HUMAN]	0.0938	1	1	1	4	10530000	1	1	2	2	0.0938	0.0938	7.14	92.87	128	14.2	6.48
O00468	Agrin OS=Homo sapiens GN=AGRN PE=1 SV=5 - [AGRIN_HUMAN]	0.2013	1	26	26	71	9943000	26	26	36	35	0.2013	0.2013	118.34	951.28	2067	217.1	6.39
P27348	14-3-3 protein theta OS=Homo sapiens GN=YWHAQ PE=1 SV=1 - [1433T_HUMAN]	0.4367	2	6	9	27	9845000	9	9	14	13	0.4367	0.4367	38.95	463.92	245	27.7	4.78
P13804	Electron transfer flavoprotein subunit alpha, mitochondrial OS=Homo sapiens GN=ETFA PE=1 SV=1 - [ETFA_HUMAN]	0.0571	1	1	1	2	9830000	1	1	1	1	0.0571	0.0571	3.45	48.41	333	35.1	8.38
P13645	Keratin, type I cytoskeletal 10 OS=Homo sapiens GN=KRT10 PE=1 SV=6 - [K1C10_HUMAN]	0.339	15	12	15	32	9740000	15	15	16	16	0.339	0.339	51.47	719.02	584	58.8	5.21
P60174	Triosephosphate isomerase OS=Homo sapiens GN=TPI1 PE=1 SV=3 - [TPIS_HUMAN]	0.3881	1	8	8	20	9719000	8	8	10	10	0.3881	0.3881	32.67	331.33	286	30.8	5.92
O00299	Chloride intracellular channel protein 1 OS=Homo sapiens GN=CLIC1 PE=1 SV=4 - [CLIC1_HUMAN]	0.4357	1	6	6	14	9645000	6	6	8	6	0.4357	0.4357	21.6	214.14	241	26.9	5.17
P07437	Tubulin beta chain OS=Homo sapiens GN=TUBB PE=1 SV=2 - [TBB5_HUMAN]	0.2185	6	3	8	18	9453000	8	8	9	9	0.2185	0.2185	24.57	252.43	444	49.6	4.89
Q08431	Lactadherin OS=Homo sapiens GN=MFGE8 PE=1 SV=2 - [MFGM_HUMAN]	0.3023	1	8	8	21	9344000	8	7	11	10	0.3023	0.2558	31	230.37	387	43.1	8.15
O75340	Programmed cell death protein 6 OS=Homo sapiens GN=PDCD6 PE=1 SV=1 - [PDCD6_HUMAN]	0.2304	1	4	4	10	9271000	4	4	5	5	0.2304	0.2304	15.74	168.72	191	21.9	5.4
Q9P2B2	Prostaglandin F2 receptor negative regulator OS=Homo sapiens GN=PTGFRN PE=1 SV=2 - [FPRP_HUMAN]	0.1854	1	13	13	28	9040000	13	13	14	14	0.1854	0.1854	35.45	411.41	879	98.5	6.61
P04216	Thy-1 membrane glycoprotein OS=Homo sapiens GN=THY1 PE=1 SV=2 - [THY1_HUMAN]	0.0932	1	1	1	2	8930000	1	1	1	1	0.0932	0.0932	0	20.91	161	17.9	8.73
P08758	Annexin A5 OS=Homo sapiens GN=ANXA5 PE=1 SV=2 - [ANXA5_HUMAN]	0.3688	1	8	10	26	8821000	9	10	12	14	0.35	0.3688	32.97	331.68	320	35.9	5.05
P07737	Profilin-1 OS=Homo sapiens GN=PFN1 PE=1 SV=2 - [PROF1_HUMAN]	0.5071	1	6	6	14	8510000	6	6	7	7	0.5071	0.5071	19.44	210.27	140	15	8.27
P49006	MARCKS-related protein OS=Homo sapiens GN=MARCKSL1 PE=1 SV=2 - [MRP_HUMAN]	0.4974	1	4	4	8	8273000	3	4	4	4	0.4308	0.4974	13.22	119	195	19.5	4.67
P07355	Annexin A2 OS=Homo sapiens GN=ANXA2 PE=1 SV=2 - [ANXA2_HUMAN]	0.3746	2	11	11	24	8154000	11	11	12	12	0.3746	0.3746	36.47	402.61	339	38.6	7.75
Q04917	14-3-3 protein eta OS=Homo sapiens GN=YWHAH PE=1 SV=4 - [1433F_HUMAN]	0.248	2	4	6	15	8083000	5	6	7	8	0.2073	0.248	16.41	232.67	246	28.2	4.84
P55058	Phospholipid transfer protein OS=Homo sapiens GN=PLTP PE=1 SV=1 - [PLTP_HUMAN]	0.1927	1	7	7	16	7942000	7	7	8	8	0.1927	0.1927	22.42	275.24	493	54.7	7.01
P30041	Peroxiredoxin-6 OS=Homo sapiens GN=PRDX6 PE=1 SV=3 - [PRDX6_HUMAN]	0.3125	1	5	5	9	7845000	3	5	3	6	0.1429	0.3125	7.9	119.21	224	25	6.38
P50151	Guanine nucleotide-binding protein G(I)/G(S)/G(O) subunit gamma-10 OS=Homo sapiens GN=GNG10 PE=1 SV=1 - [GBG10_HUMAN]	0.2206	1	1	1	2	7844000	1	1	1	1	0.2206	0.2206	2.88	48.26	68	7.2	7.85
P61204	ADP-ribosylation factor 3 OS=Homo sapiens GN=ARF3 PE=1 SV=2 - [ARF3_HUMAN]	0.3204	4	5	5	12	7770000	5	5	6	6	0.3204	0.3204	18.71	208.71	181	20.6	7.43
P68104	Elongation factor 1-alpha 1 OS=Homo sapiens GN=EEF1A1 PE=1 SV=1 - [EF1A1_HUMAN]	0.119	3	4	4	8	7742000	4	4	4	4	0.119	0.119	11.73	84.49	462	50.1	9.01
P23142	Fibulin-1 OS=Homo sapiens GN=FBLN1 PE=1 SV=4 - [FBLN1_HUMAN]	0.2361	1	12	12	26	7636000	11	12	12	14	0.2262	0.2361	33.77	406.55	703	77.2	5.22
P18669	Phosphoglycerate mutase 1 OS=Homo sapiens GN=PGAM1 PE=1 SV=2 - [PGAM1_HUMAN]	0.189	3	3	3	10	7491000	3	3	5	5	0.189	0.189	12.44	110.16	254	28.8	7.18
P06733	Alpha-enolase OS=Homo sapiens GN=ENO1 PE=1 SV=2 - [ENOA_HUMAN]	0.2212	3	6	6	14	7239000	6	6	7	7	0.2212	0.2212	27.07	352.46	434	47.1	7.39
P05556	Integrin beta-1 OS=Homo sapiens GN=ITGB1 PE=1 SV=2 - [ITB1_HUMAN]	0.1065	1	7	7	12	7200000	6	6	6	6	0.094	0.0865	16.84	188.19	798	88.4	5.39
P02765	Alpha-2-HS-glycoprotein OS=Homo sapiens GN=AHSG PE=1 SV=1 - [FETUA_HUMAN]	0.0518	1	2	2	3	7081000	1	2	1	2	0.0327	0.0518	3.15	109.55	367	39.3	5.72
P62873	Guanine nucleotide-binding protein G(I)/G(S)/G(T) subunit beta-1 OS=Homo sapiens GN=GNB1 PE=1 SV=3 - [GBB1_HUMAN]	0.25	3	2	6	14	6970000	6	6	7	7	0.25	0.25	20.56	263.36	340	37.4	6
P07195	L-lactate dehydrogenase B chain OS=Homo sapiens GN=LDHB PE=1 SV=2 - [LDHB_HUMAN]	0.2395	5	7	7	13	6905000	6	6	6	7	0.2216	0.2036	17.06	175.61	334	36.6	6.05
P62879	Guanine nucleotide-binding protein G(I)/G(S)/G(T) subunit beta-2 OS=Homo sapiens GN=GNB2 PE=1 SV=3 - [GBB2_HUMAN]	0.25	3	2	6	14	6628000	6	6	7	7	0.25	0.25	20.11	247.94	340	37.3	6
P04004	Vitronectin OS=Homo sapiens GN=VTN PE=1 SV=1 - [VTNC_HUMAN]	0.0314	1	1	1	2	6615000	1	1	1	1	0.0314	0.0314	3.86	46.15	478	54.3	5.8
P63092	Guanine nucleotide-binding protein G(s) subunit alpha isoforms short OS=Homo sapiens GN=GNAS PE=1 SV=1 - [GNAS2_HUMAN]	0.0736	4	2	3	6	6601000	3	3	3	3	0.0736	0.0736	7.48	96.48	394	45.6	5.82
P09936	Ubiquitin carboxyl-terminal hydrolase isozyme L1 OS=Homo sapiens GN=UCHL1 PE=1 SV=2 - [UCHL1_HUMAN]	0.2018	1	3	3	8	6530000	3	3	4	4	0.2018	0.2018	13.16	137.82	223	24.8	5.48
P16949	Stathmin OS=Homo sapiens GN=STMN1 PE=1 SV=3 - [STMN1_HUMAN]	0.2953	2	4	4	8	6413000	4	4	4	4	0.2953	0.2953	9.87	112.88	149	17.3	5.97
Q12841	Follistatin-related protein 1 OS=Homo sapiens GN=FSTL1 PE=1 SV=1 - [FSTL1_HUMAN]	0.2208	1	6	6	14	6341000	6	6	7	7	0.2208	0.2208	20.7	208.72	308	35	5.52
Q14344	Guanine nucleotide-binding protein subunit alpha-13 OS=Homo sapiens GN=GNA13 PE=1 SV=2 - [GNA13_HUMAN]	0.1008	3	2	3	6	6243000	3	3	3	3	0.1008	0.1008	8.84	69.84	377	44	8
P69905	Hemoglobin subunit alpha OS=Homo sapiens GN=HBA1 PE=1 SV=2 - [HBA_HUMAN]	0.2817	1	3	3	10	6221000	3	2	5	5	0.2817	0.2183	12.6	91.58	142	15.2	8.68
O14745	Na(+)/H(+) exchange regulatory cofactor NHE-RF1 OS=Homo sapiens GN=SLC9A3R1 PE=1 SV=4 - [NHRF1_HUMAN]	0.0391	1	1	1	2	6003000	1	1	1	1	0.0391	0.0391	3.13	64.25	358	38.8	5.77
P04114	Apolipoprotein B-100 OS=Homo sapiens GN=APOB PE=1 SV=2 - [APOB_HUMAN]	0.0467	2	18	18	36	5856000	17	18	18	18	0.0451	0.0467	46.19	612.32	4563	515.3	7.05
O15230	Laminin subunit alpha-5 OS=Homo sapiens GN=LAMA5 PE=1 SV=8 - [LAMA5_HUMAN]	0.105	1	29	29	65	5788000	28	27	33	32	0.1031	0.0982	89.07	877.32	3695	399.5	7.02
P20908	Collagen alpha-1(V) chain OS=Homo sapiens GN=COL5A1 PE=1 SV=3 - [CO5A1_HUMAN]	0.0457	1	5	5	19	5725000	5	5	10	9	0.0457	0.0457	30.58	231.42	1838	183.4	5.06
P12277	Creatine kinase B-type OS=Homo sapiens GN=CKB PE=1 SV=1 - [KCRB_HUMAN]	0.3333	1	9	9	21	5570000	8	9	10	11	0.3071	0.3333	30.69	346.97	381	42.6	5.59
P26038	Moesin OS=Homo sapiens GN=MSN PE=1 SV=3 - [MOES_HUMAN]	0.3241	2	13	18	44	5441000	18	17	23	21	0.3241	0.2946	52.75	572.34	577	67.8	6.4
P18206	Vinculin OS=Homo sapiens GN=VCL PE=1 SV=4 - [VINC_HUMAN]	0.1032	1	9	9	17	5318000	8	9	8	9	0.0838	0.1032	24.27	265.53	1134	123.7	5.66
P50502	Hsc70-interacting protein OS=Homo sapiens GN=ST13 PE=1 SV=2 - [F10A1_HUMAN]	0.1409	3	4	4	7	5283000	4	3	4	3	0.1409	0.0949	10.56	105.74	369	41.3	5.27
Q9H444	Charged multivesicular body protein 4b OS=Homo sapiens GN=CHMP4B PE=1 SV=1 - [CHM4B_HUMAN]	0.1071	1	2	2	4	5177000	2	2	2	2	0.1071	0.1071	6.94	109.77	224	24.9	4.82
P09211	Glutathione S-transferase P OS=Homo sapiens GN=GSTP1 PE=1 SV=2 - [GSTP1_HUMAN]	0.3571	1	5	5	13	5153000	5	5	6	7	0.3571	0.3571	19.25	192.07	210	23.3	5.64
P01023	Alpha-2-macroglobulin OS=Homo sapiens GN=A2M PE=1 SV=3 - [A2MG_HUMAN]	0.0197	1	2	2	6	5128000	2	2	3	3	0.0197	0.0197	7.84	98.72	1474	163.2	6.46
P01871	Ig mu chain C region OS=Homo sapiens GN=IGHM PE=1 SV=3 - [IGHM_HUMAN]	0.104	2	4	4	10	5076000	4	4	5	5	0.104	0.104	14.01	160.37	452	49.3	6.77
P05023	Sodium/potassium-transporting ATPase subunit alpha-1 OS=Homo sapiens GN=ATP1A1 PE=1 SV=1 - [AT1A1_HUMAN]	0.1496	5	11	11	24	5042000	11	10	12	12	0.1496	0.1359	36.17	417.49	1023	112.8	5.49
Q9NZZ3	Charged multivesicular body protein 5 OS=Homo sapiens GN=CHMP5 PE=1 SV=1 - [CHMP5_HUMAN]	0.1689	1	2	2	4	5022000	2	2	2	2	0.1689	0.1689	6	53.83	219	24.6	4.83
P08195	4F2 cell-surface antigen heavy chain OS=Homo sapiens GN=SLC3A2 PE=1 SV=3 - [4F2_HUMAN]	0.2016	1	10	10	20	4965000	10	10	10	10	0.2016	0.2016	30.86	379.04	630	68	5.01
P00558	Phosphoglycerate kinase 1 OS=Homo sapiens GN=PGK1 PE=1 SV=3 - [PGK1_HUMAN]	0.2902	2	8	8	20	4860000	8	8	10	10	0.2902	0.2902	31.29	274.44	417	44.6	8.1
Q8WUM4	Programmed cell death 6-interacting protein OS=Homo sapiens GN=PDCD6IP PE=1 SV=1 - [PDC6I_HUMAN]	0.144	1	12	12	22	4858000	11	11	11	11	0.1336	0.1336	31.14	296.49	868	96	6.52
P14543	Nidogen-1 OS=Homo sapiens GN=NID1 PE=1 SV=3 - [NID1_HUMAN]	0.1115	1	10	10	25	4830000	10	9	13	12	0.1115	0.0882	34.99	345.03	1247	136.3	5.29
P01877	Ig alpha-2 chain C region OS=Homo sapiens GN=IGHA2 PE=1 SV=3 - [IGHA2_HUMAN]	0.05	2	1	1	2	4624000	1	1	1	1	0.05	0.05	4.1	81.72	340	36.5	6.1
P35241	Radixin OS=Homo sapiens GN=RDX PE=1 SV=1 - [RADI_HUMAN]	0.163	2	5	10	22	4564000	10	9	12	10	0.163	0.1458	35.99	409.69	583	68.5	6.37
P08670	Vimentin OS=Homo sapiens GN=VIM PE=1 SV=4 - [VIME_HUMAN]	0.206	3	9	9	17	4555000	8	9	8	9	0.1867	0.206	19.82	261.09	466	53.6	5.12
P63000	Ras-related C3 botulinum toxin substrate 1 OS=Homo sapiens GN=RAC1 PE=1 SV=1 - [RAC1_HUMAN]	0.1667	3	3	3	7	4546000	3	2	4	3	0.1667	0.125	12.01	110.75	192	21.4	8.5
P61026	Ras-related protein Rab-10 OS=Homo sapiens GN=RAB10 PE=1 SV=1 - [RAB10_HUMAN]	0.115	4	1	2	5	4461000	2	2	3	2	0.115	0.115	5.1	77.99	200	22.5	8.38
P61769	Beta-2-microglobulin OS=Homo sapiens GN=B2M PE=1 SV=1 - [B2MG_HUMAN]	0.1681	1	2	2	8	4387000	2	2	4	4	0.1681	0.1681	11.62	102.06	119	13.7	6.52
P68371	Tubulin beta-4B chain OS=Homo sapiens GN=TUBB4B PE=1 SV=1 - [TBB4B_HUMAN]	0.191	6	2	7	15	4186000	7	6	8	7	0.191	0.1573	19.59	171.48	445	49.8	4.89
P30086	Phosphatidylethanolamine-binding protein 1 OS=Homo sapiens GN=PEBP1 PE=1 SV=3 - [PEBP1_HUMAN]	0.3048	1	4	4	8	4127000	4	4	4	4	0.3048	0.3048	12.52	172.2	187	21	7.53
P11233	Ras-related protein Ral-A OS=Homo sapiens GN=RALA PE=1 SV=1 - [RALA_HUMAN]	0.1553	1	1	3	5	4080000	2	3	2	3	0.1019	0.1553	6.53	104.02	206	23.6	7.11
P06744	Glucose-6-phosphate isomerase OS=Homo sapiens GN=GPI PE=1 SV=4 - [G6PI_HUMAN]	0.086	1	4	4	7	3946000	4	3	4	3	0.086	0.0735	10.92	109.07	558	63.1	8.32
P08133	Annexin A6 OS=Homo sapiens GN=ANXA6 PE=1 SV=3 - [ANXA6_HUMAN]	0.2229	1	13	13	28	3874000	13	11	15	13	0.2229	0.1828	37.63	327.79	673	75.8	5.6
P10909	Clusterin OS=Homo sapiens GN=CLU PE=1 SV=1 - [CLUS_HUMAN]	0.1247	1	5	5	8	3771000	3	5	3	5	0.0891	0.1247	9.53	143.8	449	52.5	6.27
P58546	Myotrophin OS=Homo sapiens GN=MTPN PE=1 SV=2 - [MTPN_HUMAN]	0.1441	1	1	1	2	3756000	1	1	1	1	0.1441	0.1441	5.08	80.77	118	12.9	5.52
P32119	Peroxiredoxin-2 OS=Homo sapiens GN=PRDX2 PE=1 SV=5 - [PRDX2_HUMAN]	0.2273	1	3	4	10	3736000	4	4	5	5	0.2273	0.2273	12.65	117.63	198	21.9	5.97
Q13308	Inactive tyrosine-protein kinase 7 OS=Homo sapiens GN=PTK7 PE=1 SV=2 - [PTK7_HUMAN]	0.0449	1	3	3	6	3700000	3	3	3	3	0.0449	0.0449	7.51	111.67	1070	118.3	7.09
O60814	Histone H2B type 1-K OS=Homo sapiens GN=HIST1H2BK PE=1 SV=3 - [H2B1K_HUMAN]	0.2063	15	2	2	13	3650000	1	2	6	7	0.119	0.2063	19.35	208.46	126	13.9	10.32
Q969P0	Immunoglobulin superfamily member 8 OS=Homo sapiens GN=IGSF8 PE=1 SV=1 - [IGSF8_HUMAN]	0.1011	1	4	4	8	3642000	4	4	4	4	0.1011	0.1011	11.8	138.28	613	65	8
P60660	Myosin light polypeptide 6 OS=Homo sapiens GN=MYL6 PE=1 SV=2 - [MYL6_HUMAN]	0.3841	4	5	5	10	3547000	5	5	5	5	0.3841	0.3841	14.38	140.63	151	16.9	4.65
Q15758	Neutral amino acid transporter B(0) OS=Homo sapiens GN=SLC1A5 PE=1 SV=2 - [AAAT_HUMAN]	0.1368	1	5	5	10	3494000	5	5	5	5	0.1368	0.1368	13.18	159.06	541	56.6	5.48
P31689	DnaJ homolog subfamily A member 1 OS=Homo sapiens GN=DNAJA1 PE=1 SV=2 - [DNJA1_HUMAN]	0.199	1	5	5	10	3473000	5	5	5	5	0.199	0.199	15.79	137.18	397	44.8	7.08
P13473	Lysosome-associated membrane glycoprotein 2 OS=Homo sapiens GN=LAMP2 PE=1 SV=2 - [LAMP2_HUMAN]	0.0195	1	1	1	2	3441000	1	1	1	1	0.0195	0.0195	2.56	54.45	410	44.9	5.63
P04275	von Willebrand factor OS=Homo sapiens GN=VWF PE=1 SV=4 - [VWF_HUMAN]	0.0178	1	3	3	8	3437000	3	3	4	4	0.0178	0.0178	13.58	136.73	2813	309.1	5.48
Q99497	Protein DJ-1 OS=Homo sapiens GN=PARK7 PE=1 SV=2 - [PARK7_HUMAN]	0.0794	1	1	1	2	3386000	1	1	1	1	0.0794	0.0794	2.76	66.59	189	19.9	6.79
P09651	Heterogeneous nuclear ribonucleoprotein A1 OS=Homo sapiens GN=HNRNPA1 PE=1 SV=5 - [ROA1_HUMAN]	0.1747	2	4	5	9	3372000	4	5	4	5	0.1398	0.1747	9.68	108.72	372	38.7	9.13
Q15286	Ras-related protein Rab-35 OS=Homo sapiens GN=RAB35 PE=1 SV=1 - [RAB35_HUMAN]	0.2139	4	4	5	9	3347000	4	5	4	5	0.1791	0.2139	9.24	114.69	201	23	8.29
P05387	60S acidic ribosomal protein P2 OS=Homo sapiens GN=RPLP2 PE=1 SV=1 - [RLA2_HUMAN]	0.3652	1	2	3	6	3304000	3	3	3	3	0.3652	0.3652	9.98	118.1	115	11.7	4.54
Q9Y3L5	Ras-related protein Rap-2c OS=Homo sapiens GN=RAP2C PE=1 SV=1 - [RAP2C_HUMAN]	0.1366	2	2	2	4	3129000	2	2	2	2	0.1366	0.1366	5.59	60.66	183	20.7	4.94
P01834	Ig kappa chain C region OS=Homo sapiens GN=IGKC PE=1 SV=1 - [IGKC_HUMAN]	0.1698	1	1	1	4	3064000	1	1	2	2	0.1698	0.1698	5.7	29.5	106	11.6	5.87
O00161	Synaptosomal-associated protein 23 OS=Homo sapiens GN=SNAP23 PE=1 SV=1 - [SNP23_HUMAN]	0.3223	1	5	5	12	2913000	5	5	6	6	0.3223	0.3223	17.04	178.67	211	23.3	5.01
P01111	GTPase NRas OS=Homo sapiens GN=NRAS PE=1 SV=1 - [RASN_HUMAN]	0.1693	3	3	3	6	2824000	3	3	3	3	0.1693	0.1693	7.39	68.47	189	21.2	5.17
Q8N2S1	Latent-transforming growth factor beta-binding protein 4 OS=Homo sapiens GN=LTBP4 PE=1 SV=2 - [LTBP4_HUMAN]	0.1022	1	10	10	19	2820000	10	8	11	8	0.1022	0.0751	29.48	266.86	1624	173.3	5.43
P40925	Malate dehydrogenase, cytoplasmic OS=Homo sapiens GN=MDH1 PE=1 SV=4 - [MDHC_HUMAN]	0.0749	1	2	2	4	2738000	2	2	2	2	0.0749	0.0749	6.2	73.82	334	36.4	7.36
P54709	Sodium/potassium-transporting ATPase subunit beta-3 OS=Homo sapiens GN=ATP1B3 PE=1 SV=1 - [AT1B3_HUMAN]	0.0502	1	1	1	2	2604000	1	1	1	1	0.0502	0.0502	3.58	47.76	279	31.5	8.35
P09525	Annexin A4 OS=Homo sapiens GN=ANXA4 PE=1 SV=4 - [ANXA4_HUMAN]	0.2508	1	5	7	15	2538000	6	7	7	8	0.232	0.2508	21.42	269.26	319	35.9	6.13
Q9H4G4	Golgi-associated plant pathogenesis-related protein 1 OS=Homo sapiens GN=GLIPR2 PE=1 SV=3 - [GAPR1_HUMAN]	0.0844	1	1	1	2	2437000	1	1	1	1	0.0844	0.0844	2.56	27.2	154	17.2	9.41
O95297	Myelin protein zero-like protein 1 OS=Homo sapiens GN=MPZL1 PE=1 SV=1 - [MPZL1_HUMAN]	0.1413	1	3	3	6	2420000	3	3	3	3	0.1413	0.1413	5.54	43.58	269	29.1	8.72
P02647	Apolipoprotein A-I OS=Homo sapiens GN=APOA1 PE=1 SV=1 - [APOA1_HUMAN]	0.1086	1	2	2	4	2411000	2	2	2	2	0.1086	0.1086	5.83	74.18	267	30.8	5.76
Q16563	Synaptophysin-like protein 1 OS=Homo sapiens GN=SYPL1 PE=1 SV=1 - [SYPL1_HUMAN]	0.0425	1	1	1	2	2365000	1	1	1	1	0.0425	0.0425	2.13	41.85	259	28.5	8.43
P24534	Elongation factor 1-beta OS=Homo sapiens GN=EEF1B2 PE=1 SV=3 - [EF1B_HUMAN]	0.0667	1	1	1	2	2365000	1	1	1	1	0.0667	0.0667	4.85	79.15	225	24.7	4.67
P52565	Rho GDP-dissociation inhibitor 1 OS=Homo sapiens GN=ARHGDIA PE=1 SV=3 - [GDIR1_HUMAN]	0.1863	1	3	3	5	2353000	3	2	3	2	0.1863	0.152	8.99	120.17	204	23.2	5.11
Q04941	Proteolipid protein 2 OS=Homo sapiens GN=PLP2 PE=1 SV=1 - [PLP2_HUMAN]	0.0855	1	1	1	2	2340000	1	1	1	1	0.0855	0.0855	1.91	24.76	152	16.7	7.24
Q7L9L4	MOB kinase activator 1B OS=Homo sapiens GN=MOB1B PE=1 SV=3 - [MOB1B_HUMAN]	0.0509	2	1	1	1	2227000	1		1		0.0509		2.19		216	25.1	6.73
P02751	Fibronectin OS=Homo sapiens GN=FN1 PE=1 SV=4 - [FINC_HUMAN]	0.0155	1	2	2	4	2135000	2	2	2	2	0.0155	0.0155	7.54	98.32	2386	262.5	5.71
Q12846	Syntaxin-4 OS=Homo sapiens GN=STX4 PE=1 SV=2 - [STX4_HUMAN]	0.064	1	1	1	3	2132000	1	1	1	2	0.064	0.064	3.32	48.91	297	34.2	6.28
P55209	Nucleosome assembly protein 1-like 1 OS=Homo sapiens GN=NAP1L1 PE=1 SV=1 - [NP1L1_HUMAN]	0.1151	2	3	3	4	2120000	3	1	3	1	0.1151	0.0435	6.96	68.02	391	45.3	4.46
P08648	Integrin alpha-5 OS=Homo sapiens GN=ITGA5 PE=1 SV=2 - [ITA5_HUMAN]	0.0429	1	3	3	8	2107000	3	3	4	4	0.0429	0.0429	14.7	198.29	1049	114.5	5.77
P51149	Ras-related protein Rab-7a OS=Homo sapiens GN=RAB7A PE=1 SV=1 - [RAB7A_HUMAN]	0.1787	1	3	3	8	2062000	3	3	4	4	0.1787	0.1787	13.85	175.05	207	23.5	6.7
P50995	Annexin A11 OS=Homo sapiens GN=ANXA11 PE=1 SV=1 - [ANX11_HUMAN]	0.101	2	4	4	8	2059000	4	4	4	4	0.101	0.101	11.38	149.85	505	54.4	7.65
P02656	Apolipoprotein C-III OS=Homo sapiens GN=APOC3 PE=1 SV=1 - [APOC3_HUMAN]	0.1616	1	1	1	2	1997000	1	1	1	1	0.1616	0.1616	3.66	77.02	99	10.8	5.41
P10301	Ras-related protein R-Ras OS=Homo sapiens GN=RRAS PE=1 SV=1 - [RRAS_HUMAN]	0.1284	1	1	2	4	1985000	2	2	2	2	0.1284	0.1284	8.31	126.04	218	23.5	6.93
P20073	Annexin A7 OS=Homo sapiens GN=ANXA7 PE=1 SV=3 - [ANXA7_HUMAN]	0.1148	1	5	5	12	1980000	5	4	7	5	0.1148	0.0922	14.3	129.7	488	52.7	5.68
P35221	Catenin alpha-1 OS=Homo sapiens GN=CTNNA1 PE=1 SV=1 - [CTNA1_HUMAN]	0.0751	2	5	5	9	1950000	5	4	5	4	0.0751	0.0607	17.15	202.23	906	100	6.29
P18065	Insulin-like growth factor-binding protein 2 OS=Homo sapiens GN=IGFBP2 PE=1 SV=2 - [IBP2_HUMAN]	0.1046	1	3	3	6	1890000	3	3	3	3	0.1046	0.1046	9.3	125.99	325	34.8	7.5
P60953	Cell division control protein 42 homolog OS=Homo sapiens GN=CDC42 PE=1 SV=2 - [CDC42_HUMAN]	0.1466	1	2	2	7	1869000	2	2	4	3	0.1466	0.1466	9.43	34.9	191	21.2	6.55
Q9ULC3	Ras-related protein Rab-23 OS=Homo sapiens GN=RAB23 PE=1 SV=1 - [RAB23_HUMAN]	0.1097	1	2	2	4	1856000	2	2	2	2	0.1097	0.1097	6.44	84.43	237	26.6	6.6
Q9NRY6	Phospholipid scramblase 3 OS=Homo sapiens GN=PLSCR3 PE=1 SV=2 - [PLS3_HUMAN]	0.1322	1	2	2	4	1795000	2	2	2	2	0.1322	0.1322	4.79	88.64	295	31.6	6.65
P62942	Peptidyl-prolyl cis-trans isomerase FKBP1A OS=Homo sapiens GN=FKBP1A PE=1 SV=2 - [FKB1A_HUMAN]	0.1204	1	1	1	1	1794000		1		1		0.1204		47.23	108	11.9	8.16
O75781	Paralemmin-1 OS=Homo sapiens GN=PALM PE=1 SV=2 - [PALM_HUMAN]	0.1266	1	3	3	6	1781000	3	3	3	3	0.1266	0.1266	5.67	81.54	387	42.1	5
P14209	CD99 antigen OS=Homo sapiens GN=CD99 PE=1 SV=1 - [CD99_HUMAN]	0.0757	1	1	1	2	1682000	1	1	1	1	0.0757	0.0757	3.7	62.02	185	18.8	4.75
P29692	Elongation factor 1-delta OS=Homo sapiens GN=EEF1D PE=1 SV=5 - [EF1D_HUMAN]	0.1708	1	3	3	6	1674000	3	3	3	3	0.1708	0.1708	9.11	108.44	281	31.1	5.01
P37802	Transgelin-2 OS=Homo sapiens GN=TAGLN2 PE=1 SV=3 - [TAGL2_HUMAN]	0.1256	1	2	2	6	1672000	2	2	3	3	0.1256	0.1256	9.99	126.22	199	22.4	8.25
P18827	Syndecan-1 OS=Homo sapiens GN=SDC1 PE=1 SV=3 - [SDC1_HUMAN]	0.1032	1	3	3	5	1653000	2	3	2	3	0.1	0.1032	7.59	150.01	310	32.4	4.63
P09382	Galectin-1 OS=Homo sapiens GN=LGALS1 PE=1 SV=2 - [LEG1_HUMAN]	0.2667	1	3	3	6	1651000	3	3	3	3	0.2667	0.2667	9.13	132.34	135	14.7	5.5
Q99961	Endophilin-A2 OS=Homo sapiens GN=SH3GL1 PE=1 SV=1 - [SH3G1_HUMAN]	0.1685	1	4	4	10	1620000	4	4	5	5	0.1685	0.1685	11.99	164.4	368	41.5	5.43
Q9P273	Teneurin-3 OS=Homo sapiens GN=TENM3 PE=2 SV=3 - [TEN3_HUMAN]	0.0044	1	1	1	2	1603000	1	1	1	1	0.0044	0.0044	3.93	68.71	2699	300.8	6.42
P63208	S-phase kinase-associated protein 1 OS=Homo sapiens GN=SKP1 PE=1 SV=2 - [SKP1_HUMAN]	0.2454	1	3	4	7	1491000	3	4	3	4	0.2086	0.2454	8.6	103.27	163	18.6	4.54
P22626	Heterogeneous nuclear ribonucleoproteins A2/B1 OS=Homo sapiens GN=HNRNPA2B1 PE=1 SV=2 - [ROA2_HUMAN]	0.0907	1	2	3	6	1468000	3	3	3	3	0.0907	0.0907	6.6	60.76	353	37.4	8.95
P84095	Rho-related GTP-binding protein RhoG OS=Homo sapiens GN=RHOG PE=1 SV=1 - [RHOG_HUMAN]	0.0995	1	1	1	2	1445000	1	1	1	1	0.0995	0.0995	2.9	43.71	191	21.3	8.12
Q15365	Poly(rC)-binding protein 1 OS=Homo sapiens GN=PCBP1 PE=1 SV=2 - [PCBP1_HUMAN]	0.0702	3	2	2	4	1435000	2	2	2	2	0.0702	0.0702	5.61	67.15	356	37.5	7.09
P09972	Fructose-bisphosphate aldolase C OS=Homo sapiens GN=ALDOC PE=1 SV=2 - [ALDOC_HUMAN]	0.1044	1	2	2	3	1409000	2	1	2	1	0.1044	0.0632	2.48	17.33	364	39.4	6.87
P53990	IST1 homolog OS=Homo sapiens GN=IST1 PE=1 SV=1 - [IST1_HUMAN]	0.1044	1	3	3	6	1395000	3	3	3	3	0.1044	0.1044	6.47	42.63	364	39.7	5.35
O75695	Protein XRP2 OS=Homo sapiens GN=RP2 PE=1 SV=4 - [XRP2_HUMAN]	0.0629	1	2	2	4	1269000	2	2	2	2	0.0629	0.0629	2.89	66	350	39.6	5.12
Q53EZ4	Centrosomal protein of 55 kDa OS=Homo sapiens GN=CEP55 PE=1 SV=3 - [CEP55_HUMAN]	0.1056	1	5	5	11	1241000	4	5	5	6	0.1034	0.1056	17.42	220.6	464	54.1	7.01
Q15599	Na(+)/H(+) exchange regulatory cofactor NHE-RF2 OS=Homo sapiens GN=SLC9A3R2 PE=1 SV=2 - [NHRF2_HUMAN]	0.1246	1	3	3	5	1224000	3	2	3	2	0.1246	0.0653	8.81	110.57	337	37.4	7.93
O14964	Hepatocyte growth factor-regulated tyrosine kinase substrate OS=Homo sapiens GN=HGS PE=1 SV=1 - [HGS_HUMAN]	0.027	1	2	2	4	1218000	2	2	2	2	0.027	0.027	4.91	34.91	777	86.1	6.16
O14791	Apolipoprotein L1 OS=Homo sapiens GN=APOL1 PE=1 SV=5 - [APOL1_HUMAN]	0.0377	1	1	1	2	1216000	1	1	1	1	0.0377	0.0377	3.83	63.3	398	43.9	5.81
Q92783	Signal transducing adapter molecule 1 OS=Homo sapiens GN=STAM PE=1 SV=3 - [STAM1_HUMAN]	0.0463	1	2	2	4	1208000	2	2	2	2	0.0463	0.0463	7.47	104.99	540	59.1	4.82
P07996	Thrombospondin-1 OS=Homo sapiens GN=THBS1 PE=1 SV=2 - [TSP1_HUMAN]	0.0103	1	1	1	2	1192000	1	1	1	1	0.0103	0.0103	3.57	43.13	1170	129.3	4.94
Q9H9H4	Vacuolar protein sorting-associated protein 37B OS=Homo sapiens GN=VPS37B PE=1 SV=1 - [VP37B_HUMAN]	0.0982	1	2	2	4	1178000	2	2	2	2	0.0982	0.0982	5.81	81.89	285	31.3	7.34
Q9Y696	Chloride intracellular channel protein 4 OS=Homo sapiens GN=CLIC4 PE=1 SV=4 - [CLIC4_HUMAN]	0.17	1	3	3	11	1129000	3	3	5	6	0.17	0.17	12.53	72.96	253	28.8	5.59
P53985	Monocarboxylate transporter 1 OS=Homo sapiens GN=SLC16A1 PE=1 SV=3 - [MOT1_HUMAN]	0.064	1	3	3	7	1123000	3	2	4	3	0.064	0.058	7.67	51.01	500	53.9	8.66
P61088	Ubiquitin-conjugating enzyme E2 N OS=Homo sapiens GN=UBE2N PE=1 SV=1 - [UBE2N_HUMAN]	0.1711	2	2	2	6	1105000	2	2	3	3	0.1711	0.1711	8.89	58.37	152	17.1	6.57
P05386	60S acidic ribosomal protein P1 OS=Homo sapiens GN=RPLP1 PE=1 SV=1 - [RLA1_HUMAN]	0.2895	1	1	2	6	1105000	2	2	3	3	0.2895	0.2895	8.31	49.51	114	11.5	4.32
Q02818	Nucleobindin-1 OS=Homo sapiens GN=NUCB1 PE=1 SV=4 - [NUCB1_HUMAN]	0.0456	1	2	2	4	1065000	2	2	2	2	0.0456	0.0456	6.03	135	461	53.8	5.25
Q96FZ7	Charged multivesicular body protein 6 OS=Homo sapiens GN=CHMP6 PE=1 SV=3 - [CHMP6_HUMAN]	0.0647	1	1	1	2	961400	1	1	1	1	0.0647	0.0647	3.51	85.7	201	23.5	5.31
Q9H4M9	EH domain-containing protein 1 OS=Homo sapiens GN=EHD1 PE=1 SV=2 - [EHD1_HUMAN]	0.0449	1	2	2	4	948400	2	2	2	2	0.0449	0.0449	5.33	49.52	534	60.6	6.83
P31948	Stress-induced-phosphoprotein 1 OS=Homo sapiens GN=STIP1 PE=1 SV=1 - [STIP1_HUMAN]	0.0534	1	2	2	4	876600	2	2	2	2	0.0534	0.0534	5.69	61.12	543	62.6	6.8
Q16543	Hsp90 co-chaperone Cdc37 OS=Homo sapiens GN=CDC37 PE=1 SV=1 - [CDC37_HUMAN]	0.1005	1	2	2	4	769500	2	2	2	2	0.1005	0.1005	6.36	31.94	378	44.4	5.25
Q14108	Lysosome membrane protein 2 OS=Homo sapiens GN=SCARB2 PE=1 SV=2 - [SCRB2_HUMAN]	0.0272	1	1	1	2	693400	1	1	1	1	0.0272	0.0272	3.15	24.97	478	54.3	5.14
A6NDB9	Paralemmin-3 OS=Homo sapiens GN=PALM3 PE=1 SV=2 - [PALM3_HUMAN]	0.0223	1	1	1	2	653700	1	1	1	1	0.0223	0.0223	2.83	62.26	673	71.7	4.53
O60716	Catenin delta-1 OS=Homo sapiens GN=CTNND1 PE=1 SV=1 - [CTND1_HUMAN]	0.0103	1	1	1	2	648600	1	1	1	1	0.0103	0.0103	2.61	22.72	968	108.1	6.23
O75347	Tubulin-specific chaperone A OS=Homo sapiens GN=TBCA PE=1 SV=3 - [TBCA_HUMAN]	0.1759	1	2	2	3	607900	1	2	1	2	0.0926	0.1759	2.6	49.43	108	12.8	5.29
A5D8V6	Vacuolar protein sorting-associated protein 37C OS=Homo sapiens GN=VPS37C PE=1 SV=2 - [VP37C_HUMAN]	0.031	1	1	1	2	490600	1	1	1	1	0.031	0.031	3.58	69.69	355	38.6	5.21
P63218	Guanine nucleotide-binding protein G(I)/G(S)/G(O) subunit gamma-5 OS=Homo sapiens GN=GNG5 PE=1 SV=3 - [GBG5_HUMAN]	0.1324	1	1	1	2	363200	1	1	1	1	0.1324	0.1324	2.18	37.98	68	7.3	9.85
P38646	Stress-70 protein, mitochondrial OS=Homo sapiens GN=HSPA9 PE=1 SV=2 - [GRP75_HUMAN]	0.0133	1	1	1	2	353900	1	1	1	1	0.0133	0.0133	2.72	44.86	679	73.6	6.16
P14550	Alcohol dehydrogenase [NADP(+)] OS=Homo sapiens GN=AKR1A1 PE=1 SV=3 - [AK1A1_HUMAN]	0.0585	1	1	1	4	333000	1	1	2	2	0.0585	0.0585	5.76	47.87	325	36.5	6.79
Q9BX67	Junctional adhesion molecule C OS=Homo sapiens GN=JAM3 PE=1 SV=1 - [JAM3_HUMAN]	0.0258	1	1	1	2	320900	1	1	1	1	0.0258	0.0258	1.74	31.54	310	35	7.59
P05067	Amyloid beta A4 protein OS=Homo sapiens GN=APP PE=1 SV=3 - [A4_HUMAN]	0.0429	1	3	3	4	271400	1	3	1	3	0.0169	0.0429	1.93	59.57	770	86.9	4.82
Q9C0H2	Protein tweety homolog 3 OS=Homo sapiens GN=TTYH3 PE=1 SV=3 - [TTYH3_HUMAN]	0.0593	1	2	2	5	209600	2	2	2	3	0.0593	0.0593	4.85	53.22	523	57.5	5.39
P60981	Destrin OS=Homo sapiens GN=DSTN PE=1 SV=3 - [DEST_HUMAN]	0.0788	1	1	1	2	100500	1	1	1	1	0.0788	0.0788	2.18	25.8	165	18.5	7.85
P27105	Erythrocyte band 7 integral membrane protein OS=Homo sapiens GN=STOM PE=1 SV=3 - [STOM_HUMAN]	0.0764	1	2	2	3	72430	1	2	1	2	0.0417	0.0764	3.16	53.24	288	31.7	7.88
