# Supplementary material for: Liquid Biopsy Targeting Monocarboxylate Transporter 1 on the Surface Membrane of Tumor-Derived Extracellular Vesicles from Synovial Sarcoma
Source: Cancers (Basel). 2021 Apr 11;13(8):1823. doi: 10.3390/cancers13081823 (PMC8069269; doi:10.3390/cancers13081823)
Supplement: Supplementary file 1 [file cancers-13-01823-s001.tgz › Supplementaly Table 2.xlsx]

## Sheet: Sheet1
Supplementary Table 2. List of plasma membrane in the EVs from the healthy individuals and SS patients (pre-treatment state)
AC#	Protein name	Gene names	Entry Name	healthy	healthy	healthy	healthy	SS-pre	SS-pre	SS-pre
P02771	Alpha-fetoprotein	AFP	FETA_HUMAN	2.84039e+06	3.23895e+06	2.5363e+06	3.88742e+06	7.04125e+06	3.90837e+06	4948583
P34096	Ribonuclease 4	RNASE4	RNAS4_HUMAN	5699.13	3534.98	5121.18	5871.93	60062.5	17697.8	13901.5
P07148	Fatty acid-binding protein, liver	FABP1	FABPL_HUMAN	14263.4	14520.5	10900.1	8541.37	30918.5	23710.9	22857.8
Q9UKU9	Angiopoietin-related protein 2	ANGPTL2	ANGL2_HUMAN	0	0	0	0	22013	15727.8	4520.13
P53985	Monocarboxylate transporter 1	SLC16A1	MOT1_HUMAN	50983.2	42100	51873.7	55594.4	78611	60629.6	67540.4
O95967	EGF-containing fibulin-like extracellular matrix protein 2	EFEMP2	FBLN4_HUMAN	0	0	0	0	45763.7	26238.3	17100.8
P01621	Ig kappa chain V-III region NG9	-	KV303_HUMAN	13737.9	14845.7	14638.3	20834.4	25206.3	23003.7	25802.4
Q96C36	Pyrroline-5-carboxylate reductase 2	PYCR2	P5CR2_HUMAN	36915.8	30225.1	0	35287.3	60719.6	49223.4	63845.8
Q8IV36	Protein HID1	HID1	HID1_HUMAN	4674.2	4325.32	7492.6	5313.19	7692.52	15989	10782.1
P38570	Integrin alpha-E	ITGAE	ITAE_HUMAN	11661.8	7489.13	9201.61	10956.3	24788.7	27982.1	21365
P35269	General transcription factor IIF subunit 1	GTF2F1	T2FA_HUMAN	0	0	0	0	1592.72	3938.38	6798.97
P07900	Heat shock protein HSP 90-alpha	HSP90AA1	HS90A_HUMAN	0	0	0	0	1378.38	5706.29	5068.02
Q86VQ0	Lebercilin	LCA5	LCA5_HUMAN	0	0	0	0	3235.25	3216.97	2827.93
P34925	Tyrosine-protein kinase RYK	RYK	RYK_HUMAN	4447.23	0	6507.99	6747.95	9391.66	17103.5	10840.5
P62826	GTP-binding nuclear protein Ran	RAN	RAN_HUMAN	0	0	0	0	883.891	78.7401	158.266
O60613	15 kDa selenoprotein	SEP15	SEP15_HUMAN	0	0	0	0	2737.41	2315.1	1003.62
P31949	Protein S100-A11	S100A11	S10AB_HUMAN	0	0	0	0	3083.12	1239.46	2396.46
P07864	L-lactate dehydrogenase C chain	LDHC	LDHC_HUMAN	6491.58	6586.22	5253.99	5178.09	7681.49	12136.1	7705.63
Q9UK13	Zinc finger protein 221	ZNF221	ZN221_HUMAN	0	10000	10775.7	0	13733.7	14256.1	18731.3
Q9H2X0	Chordin	CHRD	CHRD_HUMAN	0	0	0	0	1038.55	1746.83	1306.72
Q9BSV6	tRNA-splicing endonuclease subunit Sen34	TSEN34	SEN34_HUMAN	12983.2	13172.4	10508	10356.2	15363	24272.1	15411.2
Q9BZQ6	ER degradation-enhancing alpha-mannosidase-like protein 3	EDEM3	EDEM3_HUMAN	823.199	378.427	809.718	880.332	5028.76	5314.48	2342.64
P62987	Ubiquitin-60S ribosomal protein L40	UBA52	RL40_HUMAN	0	0	0	0	9160.08	31242.5	17721.8
P24666	Low molecular weight phosphotyrosine protein phosphatase	ACP1	PPAC_HUMAN	6096.93	5506.53	5352.87	4643.32	7107.15	10754.8	10931.9
Q9NRV9	Heme-binding protein 1	HEBP1	HEBP1_HUMAN	0	0	1174.27	302.644	1579.9	2203.81	3010.91
Q86UW9	Probable E3 ubiquitin-protein ligase DTX2	DTX2	DTX2_HUMAN	0	0	4202.77	5555.52	5733.78	6920.5	6981.19
Q8WXH0	Nesprin-2	SYNE2	SYNE2_HUMAN	0	0	4202.77	5555.52	5733.78	6920.5	6981.19
P51511	Matrix metalloproteinase-15	MMP15	MMP15_HUMAN	1316.11	2186.69	1654.38	1899.74	7462.78	10321.1	4913.05
Q9BZR8	Apoptosis facilitator Bcl-2-like protein 14	BCL2L14	B2L14_HUMAN	0	0	8405.55	11111	11467.6	13841	13962.4
P02763	Alpha-1-acid glycoprotein 1	ORM1	A1AG1_HUMAN	13856.5	7856.16	16540	12983.8	31920.1	48350.4	23235.7
Q15758	Neutral amino acid transporter B(0)	SLC1A5	AAAT_HUMAN	0	0	1105.31	0	3201.16	7967.12	3689.21
P07737	Profilin-1	PFN1	PROF1_HUMAN	0	0	0	1400.19	2179.01	13949.4	3913.08
P05109	Protein S100-A8	S100A8	S10A8_HUMAN	3585.67	1856.88	2918.14	4547.88	4946.24	66400.9	22176.3
Q7Z7B0	Filamin-A-interacting protein 1	FILIP1	FLIP1_HUMAN	21746.9	20272.8	20374.9	22359.3	23354	43861.5	35488.6
Q96HP0	Dedicator of cytokinesis protein 6	DOCK6	DOCK6_HUMAN	88104.3	74649.6	91513.3	88503.9	189331	215544	213785
Q9BW85	Coiled-coil domain-containing protein 94	CCDC94	CCD94_HUMAN	200787	174125	186416	157709	215994	358945	210180
P02751	Fibronectin	FN1	FINC_HUMAN	179942	169079	220558	111572	237660	252098	235166
Q9Y232	Chromodomain Y-like protein	CDYL	CDYL1_HUMAN	18636.7	7856.16	12533.3	65452.8	67855.2	105834	249732
Q9NU22	Midasin	MDN1	MDN1_HUMAN	490.908	0	956.038	1538.87	1.85752e+06	566795	788737
P04275	von Willebrand factor	VWF	VWF_HUMAN	535832	1.72517e+06	2.18266e+06	2.28566e+06	4.89109e+06	5.10869e+06	3.40022e+06
