# Supplementary material for: Liquid Biopsy Targeting Monocarboxylate Transporter 1 on the Surface Membrane of Tumor-Derived Extracellular Vesicles from Synovial Sarcoma
Source: Cancers (Basel). 2021 Apr 11;13(8):1823. doi: 10.3390/cancers13081823 (PMC8069269; doi:10.3390/cancers13081823)
Supplement: Supplementary file 1 [file cancers-13-01823-s001.tgz › Supplementaly Table 3.xlsx]

## Sheet: Sheet1
Supplementary Table 3. Comparison of the protein expression in the EVs from SS patients (Preop. versus postop.)
AC#	Protein name	Gene names	Entry Name	SS-pre	SS-post	SS-pre	SS-post	SS-pre	SS-post
P02652	Apolipoprotein A-II	APOA2	APOA2_HUMAN	453767	330547	269542	239751	481429	431853
P34096	Ribonuclease 4	RNASE4	RNAS4_HUMAN	60062.5	10212.2	17697.8	10956.6	13901.5	1305.33
Q6PII5	Hydroxyacylglutathione hydrolase-like protein	HAGHL	HAGHL_HUMAN	145925	119690	110949	96209.7	204685	159945
P53985	Monocarboxylate transporter 1	SLC16A1	MOT1_HUMAN	78611	57780.4	60629.6	60112.3	67540.4	40752.7
P10124	Serglycin	SRGN	SRGN_HUMAN	35745.3	22121.6	77747.9	7704.58	52071.4	30569.1
P01594	Ig kappa chain V-I region AU	-	KV102_HUMAN	73203.4	61383.5	70667.4	61136.5	87675.6	63312.8
P01717	Ig lambda chain V-IV region Hil	-	LV403_HUMAN	50124.1	38909.4	77250.5	51841	48609.8	47109.5
Q6Q759	Sperm-associated antigen 17	SPAG17	SPG17_HUMAN	20926.8	12435.7	16831.3	0	7207.36	6000
O00151	PDZ and LIM domain protein 1	PDLIM1	PDLI1_HUMAN	9392.57	1642.44	12027.6	8086.19	12018.8	5965.08
P05783	Keratin, type I cytoskeletal 18	KRT18	K1C18_HUMAN	5777.43	0	701.142	0	2438.1	0
P18136	Ig kappa chain V-III region HIC	-	KV313_HUMAN	11077	5406.69	8680.75	0	15701.3	0
P02766	Transthyretin	TTR	TTHY_HUMAN	5173.22	0	13074.5	2089.22	8828.52	0
Q3SY00	Testis-specific protein 10-interacting protein	TSGA10IP	T10IP_HUMAN	44488.6	40611	49332.9	29941.2	35359	18730.1
P35579	Myosin-9	MYH9	MYH9_HUMAN	4286.48	616.691	7441.89	2136.94	16841.6	15975.9
P02042	Hemoglobin subunit delta	HBD	HBD_HUMAN	4367.54	871.984	10043.9	3628.73	1903.89	0
Q15047	Histone-lysine N-methyltransferase SETDB1	SETDB1	SETB1_HUMAN	3087.67	0	6373.92	4602	5157.39	2052.15
Q14847	LIM and SH3 domain protein 1	LASP1	LASP1_HUMAN	2833.21	0	5329.49	1828.27	4999.63	277.626
P30685	HLA class I histocompatibility antigen, B-35 alpha chain	HLA-B	1B35_HUMAN	7441.65	5375.57	9145.73	0	5277.31	320.321
P01700	Ig lambda chain V-I region HA	-	LV102_HUMAN	206552	204594	19556.1	8079.44	39546.5	34103.8
P68371	Tubulin beta-4B chain	TUBB4B	TBB4B_HUMAN	4542.23	2691.58	9142.5	4466.2	13137.9	2359.65
Q8IV36	Protein HID1	HID1	HID1_HUMAN	7692.52	5964.06	15989	3739.26	10782.1	4916.94
P38570	Integrin alpha-E	ITGAE	ITAE_HUMAN	24788.7	23073.9	27982.1	21424	21365	8629.06
P35269	General transcription factor IIF subunit 1	GTF2F1	T2FA_HUMAN	1592.72	0	3938.38	0	6798.97	0
P09429	High mobility group protein B1	HMGB1	HMGB1_HUMAN	1484.29	0	1361.32	266.102	5961.7	0
P07900	Heat shock protein HSP 90-alpha	HSP90AA1	HS90A_HUMAN	1378.38	0	5706.29	3464.49	5068.02	1463.19
O95372	Acyl-protein thioesterase 2	LYPLA2	LYPA2_HUMAN	1143.54	0	553.76	505.261	225.078	0
P05156	Complement factor I	CFI	CFAI_HUMAN	14132.1	13113.4	22943.5	16994.8	19973.2	14349.2
P01613	Ig kappa chain V-I region Ni	-	KV121_HUMAN	6562.67	5860.65	9645.77	3730.16	5740.03	5710.71
P63104	14-3-3 protein zeta/delta	YWHAZ	1433Z_HUMAN	7236.72	6552.92	7463.8	6474.98	15733.8	14153.4
Q86VQ0	Lebercilin	LCA5	LCA5_HUMAN	3235.25	2636.58	3216.97	3139.54	2827.93	0
O60506	Heterogeneous nuclear ribonucleoprotein Q	SYNCRIP	HNRPQ_HUMAN	2294.52	1715.9	4314.36	2869.2	4954.44	2092.03
P34925	Tyrosine-protein kinase RYK	RYK	RYK_HUMAN	9391.66	8905.95	17103.5	7290.73	10840.5	5084.94
Q13574	Diacylglycerol kinase zeta	DGKZ	DGKZ_HUMAN	1825.72	1512.16	1639.81	940.937	3780.82	993.439
